1 **Genome edited colorectal cancer organoid models reveal distinct microRNA activity patterns across**  
2 **different mutation profiles**

3  
4 Jonathan W. Villanueva<sup>1</sup>, Lawrence Kwong<sup>1</sup>, Teng Han<sup>2</sup>, Salvador Alonso Martinez<sup>2</sup>, Michael T. Shanahan<sup>1</sup>,  
5 Matt Kanke<sup>1</sup>, Lukas E. Dow<sup>2</sup>, Charles G. Danko<sup>1,3\*</sup> and Praveen Sethupathy<sup>1\*</sup>  
6

7 <sup>1</sup>*Department of Biomedical Sciences, College of Veterinary Medicine, Cornell University, Ithaca, NY, 14853,*  
8 *USA*

9 <sup>2</sup>*Sandra and Edward Meyer Cancer Center, Department of Medicine, Weill Cornell Medicine, Cornell*  
10 *University, New York, NY, 10065, USA*

11 <sup>3</sup>*Baker Institute for Animal Health, College of Veterinary Medicine, Cornell University, Ithaca, NY 14853, USA*  
12

13 *\* Corresponding author*  
14

15 *Correspondence: [pr46@cornell.edu](mailto:pr46@cornell.edu), [cgd24@cornell.edu](mailto:cgd24@cornell.edu)*  
16  
17  
18  
19  
20

## 21 **Abstract**

22

23 Somatic mutations drive colorectal cancer (CRC) by disrupting gene regulatory mechanisms. Distinct  
24 combinations of mutations can result in unique changes to regulatory mechanisms leading to variability in the  
25 efficacy of therapeutics. MicroRNAs are important regulators of gene expression, and their activity can be  
26 altered by oncogenic mutations. However, it is unknown how distinct combinations of CRC-risk mutations  
27 differentially affect microRNAs. Here, using genetically-modified mouse intestinal organoid (enteroid) models,  
28 we identify 12 different modules of microRNA expression patterns across distinct combinations of mutations  
29 common in CRC. We also show that miR-24-3p is aberrantly upregulated in genetically-modified mouse  
30 enteroids irrespective of mutational context. Furthermore, we identify an enrichment of miR-24-3p predicted  
31 targets in downregulated gene lists from various mutational contexts compared to WT. In follow-up  
32 experiments, we demonstrate that miR-24-3p promotes CRC cell survival in multiple cell contexts. Our novel  
33 characterization of genotype-specific patterns of miRNA expression offer insight into the mechanisms that drive  
34 inter-tumor heterogeneity and highlight candidate microRNA therapeutic targets for the advancement of  
35 precision medicine for CRC.

36

## 37 **Introduction**

38

39 Colorectal cancer (CRC) is estimated to be the third most diagnosed cancer and the second leading cause  
40 of cancer-related death worldwide<sup>1</sup>. A major challenge in treating CRC patients is that molecular differences  
41 across patients' tumors, or inter-tumor heterogeneity, can lead to highly variable patient outcomes<sup>2-4</sup>. Recent  
42 advances in the understanding of CRC inter-tumor heterogeneity have led to substantial improvements in the  
43 therapeutic strategies utilized to treat CRC patients<sup>4-6</sup>. One notable example is how tumors are screened for

14 *KRAS*, *NRAS*, and *BRAF* mutations to determine eligibility for anti-EGFR monoclonal antibody treatment<sup>5,6</sup>.

15 This example represents only the beginning of the promise of personalized approaches for CRC, and strongly  
16 motivates the goal of understanding how different combinations of somatic mutations in key oncogenes and  
17 tumor suppressors promote molecular variability across tumors.

18 Mutation status plays a key role in inter-tumor heterogeneity through genotype-specific alterations of  
19 gene regulatory mechanisms that control tumor growth and development<sup>7-9</sup>. Unique combinations of driver  
20 mutations have been shown to lead to novel cancer phenotypes, including resistance to WNT inhibitors in  
21 intestinal mouse models of CRC<sup>10-12</sup>. However, most studies that investigate the effects of genetic alterations on  
22 gene regulatory mechanisms focus on the effects of individual mutations<sup>8,13,14</sup>. Therefore, there is a critical need  
23 to investigate how combinations of distinct CRC mutations alter regulatory mechanisms and drive novel cancer  
24 phenotypes.

25 MicroRNAs (miRNAs) are small, ~22 nt non-coding RNAs that canonically function as post-  
26 transcriptional, negative regulators of gene expression. It has been well documented that abnormal activity of  
27 certain miRNAs can initiate and/or exacerbate disease phenotypes, including cancer<sup>15-17</sup>. Although there remain  
28 some challenges to miRNA-based therapeutics (as with many other classes of molecular therapy), several have  
29 shown promise in pre-clinical models of cancer (such as miR-10b in breast cancer<sup>18</sup> and glioblastoma<sup>19</sup>) and  
30 some have been nominated for clinical trials<sup>20</sup> and/or are currently in different phases of clinical trials<sup>21</sup>.  
31 Numerous studies have demonstrated that miRNAs are significantly altered in CRC tissues<sup>22-24</sup>. While miRNA-  
32 based therapies have been proposed for CRC<sup>25</sup>, to our knowledge none are currently in clinical trials. Moreover,  
33 importantly, it remains unknown how different combinations of driver mutations affect miRNA profiles and  
34 how this promotes unique tumor phenotypes.

35 A major challenge in evaluating how combinations of mutations affect miRNA profiles has been a lack  
36 of appropriate cellular models. Primary tumors harbor tens to hundreds of non-silent mutations and are therefore  
37 not ideal for evaluating the effects of specific genotypes<sup>2</sup>. Additionally, primary tumors are highly

58 heterogenous and this limits our ability to assess mutation-specific miRNA alterations in the epithelium where  
59 CRC tumors form. CRC cell models also have several mutations<sup>26</sup> and are limited in their ability to recapitulate  
60 the biology of the intestinal epithelium. To address these limitations, researchers have developed genetically  
61 modified organoid models that mimic the physiology of the intestinal epithelium. Using gene editing tools  
62 (CRISPR/Cas9, Cre), specific combinations of mutations can be induced to evaluate their impact on cell  
63 behavior and/or sensitivity to therapeutics<sup>12,27</sup>. To our knowledge, these state-of-the-art intestinal model systems  
64 have not yet been used to study mutation-specific changes to miRNA profiles.

65 To address the important knowledge gaps mentioned above, we leverage genetically modified mouse  
66 small intestinal epithelial organoids (termed enteroids) to characterize how miRNA profiles change in response  
67 to different combinations of CRC driver mutations. Using small RNA-seq, we define different patterns of  
68 miRNA expression across various genotypes. In doing so, we highlight the dominant role of Tgf-B signaling in  
69 the regulation of predicted tumor suppressor miRNA, miR-375-3p. By leveraging this mouse enteroid data, in  
70 conjunction with small RNA-seq data from human primary colon tumor data from The Cancer Genome Atlas  
71 (TCGA)<sup>2</sup>, we find that miR-24-3p is up-regulated across all mutational contexts. Additionally, we observe an  
72 enrichment for predicted miR-24-3p targets in genes downregulated in multiple CRC contexts. Additional  
73 studies in multiple cell models demonstrate that miR-24-3p inhibition results in a significant decrease in cell  
74 viability by inducing apoptosis. Finally, we perform integrative analysis of RNA-seq and chromatin run-on  
75 sequencing (ChRO-seq)<sup>28</sup> to identify *HMOX1* and *PRSS8* as genes subject to strong post-transcriptional  
76 regulation by miR-24-3p in CRC. Overall, this study offers, to our knowledge, the first genome-scale  
77 characterization of miRNA patterns across distinct combinations of CRC driver mutations, provides new insight  
78 into the molecular mechanisms that drive inter-tumor heterogeneity, and defines candidate miRNA targets for  
79 future therapeutic development in CRC.

## 30 31 **Results**

32

### 33 ***Genetically modified enteroids exhibit mutation-specific variation in miRNA expression***

34 To characterize the effect of genotype on miRNA expression we performed small RNA-seq on mouse  
35 enteroids that harbor different combinations of CRC mutations (**Figure 1A, Table S1**). We focused on  
36 mutations in genes that are in signaling pathways commonly dysregulated in CRC according to The Cancer  
37 Genome Atlas (TCGA)<sup>2,12,29-31</sup>: Wnt (*Ctnnb1*, *Apc*, and *Rspo3*; 181/195 tumors in TCGA contain at least one  
38 mutation affecting this pathway), p53 (*p53*; 120/195 tumors in TCGA contain at least one mutation affecting  
39 this pathway), Mapk (*Kras*; 122/195 tumors in TCGA contain at least one mutation affecting this pathway), and  
40 Tgf-B (*Smad4*; 70/195 tumors in TCGA contain at least one mutation affecting this pathway). Using miRquant  
41 2.0, a small RNA-seq analysis tool<sup>32</sup>, we profiled miRNAs across enteroids with 9 different genotypes.  
42 Principal component analysis (PCA) revealed that miRNA profiles stratify enteroid samples by mutational  
43 combinations (**Figure 1B**). Moreover, the majority of mutant enteroids are clearly separated from wild-type  
44 (WT) in the PCA plot. The analysis also shows that *Rspo3* mutant enteroids are most similar to WT controls,  
45 which is in line with previous morphological and RNA-seq comparisons<sup>31</sup>. Therefore, *Rspo3* mutants were not  
46 incorporated into the downstream analyses.

47 Next we sought to define miRNA expression patterns across the 6 genotypes for which we have at least  
48 two biological replicates. Specifically, we performed a likelihood ratio test using DESeq2, which revealed 175  
49 miRNAs with significant expression variation across genotypes (p-adj<0.05, baseMean>500). We grouped  
50 these miRNAs into 12 distinct expression profiles, or “modules”, using DEGREport<sup>33</sup> (**Figure 1C**,  
51 **Supplemental Figure 1**). Group K (**Figure 1D**) is composed of miRNAs that exhibit a similar increase in  
52 expression across all genotypes relative to WT. One prominent example of a Group K miRNA is miR-146a-  
53 5p<sup>34,35</sup>, which functions as an oncogenic miRNA in CRC. All remaining modules exhibits non-uniform effects  
54 on miRNA expression; that is, larger changes in specific genotypes compared to others.

15 We observe multiple miRNAs, such as miR-10b-5p and miR-374-5p, that exhibit uniquely aberrant  
16 expression in *Kras/Rspo3/p53/Smad4* (KRPS) mutant enteroids, which possess the greatest mutational burden  
17 (**Supplemental Figure 1**). These miRNAs may highlight a potential mechanism by which the combination of  
18 *KRAS*, *P53*, and *SMAD4* mutations promotes particularly severe patient outcomes<sup>36,37</sup>. However, we also  
19 observe miRNA modules that display the largest expression change in enteroids with the lowest number of  
20 mutations. One such example is Group E (**Figure 1E**), in which miRNAs change the most relative to WT in  
21 *Apc* (A), *Ctnnb1* (B), and *Kras/Rspo3/p53* (KRP) mutant enteroids. This group includes tumor suppressor  
22 miRNAs such as miR-30a-5p<sup>38,39</sup> and miR-141-3p<sup>40,41</sup>. Although KRPS mutant enteroids harbor the largest  
23 number of mutations, the miRNAs in Group E exhibit only a slight elevation in this genotype. Taken together,  
24 this data supports the conclusion that the observed changes in miRNA expression are associated with specific  
25 mutational contexts, and not just a result of total mutation burden.

26 Some modules, such as Group F (**Figure 1F**), clearly highlight miRNAs associated with a particular  
27 pathway. MiRNAs in this group are elevated in mouse enteroids with either A or B mutant genotypes, in which  
28 we expect the strongest perturbation of the Wnt pathway. Multiple of these miRNAs, such as miR-10a-5p<sup>42</sup> and  
29 miR-181d-5p<sup>43</sup>, have been shown to be responsive to alterations in Wnt signaling. Additionally, this group  
30 contains miRNAs, such as miR-181c-5p<sup>44</sup> and miR-181d-5p<sup>45</sup>, that are associated with more severe CRC  
31 phenotypes. This data provides valuable insight into the role of aberrant signaling pathways on miRNA  
32 expression in the intestinal epithelium under different mutational contexts.

### 34 ***Modification of Tgf-B/Smad4 signaling is sufficient to drive miR-375-3p expression in mouse enteroids***

35 To further explore how mutations in one specific pathway can play a prominent role in the expression of  
36 miRNAs, we turned to modules in which the most significant changes in miRNA expression occur in enteroids  
37 harboring a *Smad4* mutation. Group B consists of miRNAs that exhibit the highest expression in the enteroids  
38 with *Kras/Rspo3/Smad4* (KRS) and KRPS genotypes (**Figure 2A**), whereas Group A consists of miRNAs with

the lowest expression in these two genotypes (**Figure 2B**). The latter includes miR-375-3p (**Figure 2C**), which has been reported to function as a tumor suppressor in several different cancer types<sup>46-48</sup>.

The only difference between KRP and KRPS is the presence of the *Smad4* knockout mutation. Our findings in **Figure 2C** suggest that the loss of *Smad4* has a prominent suppressive effect on miR-375-3p, which directly motivates the hypothesis that Tgf-B signaling is sufficient to increase miR-375-3p expression in mouse enteroids. To test this hypothesis, enteroids from WT B62J mice were treated with 0, 0.5, or 1 ng/mL TGF-B1 for 3 days and changes in miR-375-3p expression were quantified using RT-qPCR. Cultures treated with TGF-B1 exhibit an expected decrease in enteroid number and elevated expression of Tgf-B regulated genes (**Supplementary Figure 2**)<sup>49</sup>. TGF-B1 treatment also results in a significant increase in miR-375-3p compared to control (**Figure 2D**). These results confirm our hypothesis that the candidate tumor suppressor miRNA, miR-375-3p, from Group A is most strongly driven by changes in Tgf-B/Smad4 signaling in the intestine.

### ***Identification of differentially expressed miRNA regulators of gene expression across various genetically modified mouse enteroid models***

We next investigated miRNAs that are broadly differentially expressed across mutational contexts. These miRNAs may regulate CRC phenotypes across a broad range of genotypes and therefore could represent attractive candidates for generalized therapy. Using miRbase, we filtered for miRNA strands that are most frequently incorporated into the RNA-induced silencing complex (termed guide miRNAs). We identify 19 guide miRNAs that are significantly differentially expressed when comparing mutant enteroids to WT control (**Figure 3A, B**; DESeq2<sup>50</sup> baseMean >500, >1.5x fold change, p-adj<0.05). We next performed pair-wise comparisons between each mutant genotype (with n>1) and WT controls and found 10 miRNAs that exhibit consistent up- or downregulation (DESeq2 fold change >1.5x) across all five comparisons (**Figure 3C, D**).

Given that changes in miRNA expression don't necessarily correlate with changes in activity, we next performed RNA-seq in the same mutant enteroid models (**Table S2, Supplementary Figure 3**) to evaluate gene

53 expression changes in predicted targets of the most altered miRNAs. Using differentially expressed genes from  
54 each genotype (compared to WT) as input for our previously described statistical simulation tool, miRhub<sup>51</sup>, we  
55 can narrow down candidate miRNA regulators of gene expression changes across mutational contexts. MiRhub  
56 analysis identifies one upregulated miRNA with a significant enrichment (**Figure 3E**; p-value<0.05 in at least 3  
57 out of 5 WT vs mutant enteroid comparisons) of predicted gene targets in the lists of downregulated genes.  
58 From the downregulated miRNAs, miRhub highlights one miRNA with a significant enrichment of predicted  
59 gene targets in the lists of upregulated genes (**Figure 3E**; p-value<0.05 in at least 3 out of 5 WT vs mutant  
60 enteroid comparisons). We highlight these two miRNAs, miR-24-3p and miR-194-5p, as candidate regulators of  
61 gene expression across various mutational contexts.

### 62 *miR-24-3p is a candidate regulator of gene expression and cancer phenotypes in the human colon*

63 To place our mouse enteroid studies in a more clinically relevant context, we downloaded small RNA-  
64 and RNA-seq data from human primary colon adenocarcinoma and non-tumor tissue analyzed by TCGA<sup>2</sup>. After  
65 removing miRNAs with average expression under 1000 reads per million mapped to miRNAs (RPM) in  
66 either the tumor or non-tumor condition, we find 65 miRNAs with a significant change of expression in the  
67 tumor compared to non-tumor control (**Figure 4A**; fold change >1.5x, p-adj<0.05). Next, we identify 3190  
68 differentially expressed genes (DESeq2; average expression > 1000 normalized counts, >1.5x fold change, p-  
69 adj<0.05). Of the 65 miRNAs that are altered in human CRC tumors, 17 exhibit a significant enrichment of  
70 predicted targets among genes that change significantly in the opposite direction of the miRNA (miRhub p-  
71 value<0.05; **Figure 4B**). To account for the genetic cofounders that emerge when comparing primary tumors of  
72 one patient to non-tumor tissue from another patient, we also performed a differential miRNA expression  
73 analysis between matched tissues (n=8). Of the 17 miRNAs identified above, 15 are still significantly altered  
74 when the analysis is restricted to matched samples (**Figure 4C**).



36 Of these 15 miRNAs that are candidate key regulators of gene expression in human CRC, only miR-24-  
37 3p was also identified as a candidate regulator in the mouse enteroid analyses (**Figure 4D**). We divided TCGA  
38 primary colon tumors into genotype bins that corresponded to the mutational combinations generated in our  
39 enteroid models. For genotypes with sample size was >3 tumors, we observe a significant elevation in miR-24-  
40 3p expression compared to non-tumor controls (**Table S3**). For genotypes with sample sizes less than 4, we are  
41 limited in our ability to confidently identify differentially expressed miRNAs given the high cellular and genetic  
42 heterogeneity of the tissues. We next assessed changes in miR-24-3p expression across 23 different tumor  
43 types relative to their corresponding non-tumor tissue. We find that 12/23 tumor types have a significant  
44 alteration in miR-24-3p expression (**Figure 4E**). Of these, rectal adenocarcinoma (READ) and colon  
45 adenocarcinoma (COAD) have the highest upregulation of miR-24-3p (**Figure 4E**), indicating that miR-24-3p  
46 upregulation is strongest in CRC.

#### 47 ***Reduction of miR-24-3p increases apoptosis in HCT116 cells***

48 We hypothesized that miR-24-3p promotes colon tumor phenotypes. To evaluate this hypothesis, we  
49 performed loss-of-function studies in HCT116 cells, which is derived from a microsatellite instable human  
50 colon tumor with mutations in *CTNNB1*, *KRAS*, and *TGFBR3*. Specifically, we treated HCT116 cells with a  
51 miR-24-3p locked nucleic acid (LNA) inhibitor, which led to significantly reduced detection of miR-24-3p  
52 (**Figure 5A**). HCT116 cultures treated with a miR-24-3p inhibitor exhibit a significant reduction in cell number  
53 compared to mock and scramble controls (**Figure 5B**). We also observe a significant reduction in the number of  
54 metabolically active, viable cells as determined by the CellTiter-Glo assay (**Figure 5C**). CellTiter-Glo  
55 experiments were repeated in three additional cell lines with various degrees of effect on cell viability  
56 (**Supplementary Figure 4**). Subsequent studies continued to utilize HCT116 cells as we observed the strongest  
57 effect on cell viability in this cell context.

29 Next we asked whether the change in cell viability was caused by differences in the rate of cell  
30 proliferation, cell death, or both. To evaluate changes in proliferation, we performed an EdU incorporation  
31 assay. Our analysis shows a significant decrease in the number of DAPI+ cells (**Supplementary Figure 5A**) but  
32 does not identify a significant change in the percentage of EdU+ cells after treatment with miR-24-3p inhibitor  
33 relative to mock or scramble controls (**Figure 5D**). To evaluate changes in apoptosis, we performed a TUNEL  
34 assay. HCT116 cells treated with a miR-24-3p inhibitor display a significant decrease in the number of DAPI+  
35 cells (**Supplementary Figure 5B**) and an increase in the percentage of TUNEL+ cells compared to mock and  
36 scramble controls (**Figure 5E**). Thus, we conclude that miR-24-3p promotes CRC cell viability at least in part  
37 through suppression of apoptosis (and not through increased proliferation).

### 38 *miR-24-3p inhibition decreases mouse enteroid survival*

39 To further validate the role of miR-24-3p in regulating cell survival in the intestine, we next examined  
40 the effects of miR-24-3p inhibition on the growth and viability of mouse enteroids. Jejunal crypts were isolated  
41 from WT B62J mice and cultured ex vivo to establish enteroids, which were treated with either a miR-24-3p  
42 LNA inhibitor or scramble control for a total of five days. Enteroid cultures treated with the miR-24-3p  
43 inhibitor exhibit significant (~33%) reduction in the number of enteroids (**Figure 6A, Supplementary Figure**  
44 **6A**). However, enteroids treated with a miR-24-3p inhibitor do not exhibit a significant difference in enteroid  
45 size relative to those treated with the scramble control (**Figure 6B, Supplementary Figure 6B**). Taken  
46 together, these results provide further support that miR-24-3p promotes cell survival of intestinal epithelial  
47 cells.

### 48 *HMOX1 and PRSS8 are post-transcriptionally regulated by miR-24 in CRC*

31 To identify candidate gene targets by which miR-24-3p exerts its function in CRC, we treated HCT116  
32 cells with miR-24-3p LNA inhibitor or scramble control. After 48 hrs, we isolated RNA from these cells and  
33 performed an RNA-seq analysis to identify genes that change in response to miR-24-3p inhibition (**Table S4**).  
34 We reasoned that direct target genes should be inversely correlated with miR-24-3p; therefore, we focused our  
35 subsequent analyses on the 222 genes that are significantly elevated (expression above 500 normalized counts  
36 in either condition,  $p\text{-adj} < 0.05$ , Fold change  $> 0$ ) in response to miR-24-3p inhibition (**Figure 7A**). Of these  
37 genes, 70 are predicted miR-24-3p targets (**Figure 7B**). We performed a KEGG pathway analysis using  
38 Enrichr<sup>52-54</sup> (**Figure 7C**), which reveals that up-regulated genes with predicted miR-24-3p targets are enriched  
39 in apoptosis and ferroptosis pathways (two different forms of cell death). Notably, nine of the 70 predicted miR-  
40 24-3p target genes are also significantly downregulated (DESeq2; average expression  $> 1000$  normalized  
41 counts,  $> 1.5x$  fold change,  $p\text{-adj} < 0.05$ ) in TCGA colon tumor relative to non-tumor tissue (**Figure 7B**),  
42 including *HMOX1* and *PRSS8*, which exhibit the highest upregulation among the nine (**Figure 7D**). Moving  
43 forward, we focused on *HMOX1* and *PRSS8*, which have been shown previously to regulate cell survival in  
44 various cancer contexts<sup>55-58</sup>.

45 As an independent validation of the RNA-seq analysis, we performed RT-qPCR analysis for *HMOX1*  
46 and *PRSS8* using RNA from HCT116 cells treated with a miR-24-3p LNA inhibitor or scramble control. As  
47 expected, both genes exhibit a significant elevation in miR-24-3p inhibitor treated cells compared to control  
48 (**Figure 7E**). We also treated HCT116 cells with 50, 100, or 150 nM of miR-24-3p mimic or scramble control.  
49 Consistent with expectation, we observe a dose-dependent decrease in *HMOX1* and *PRSS8* expression (**Figure**  
50 **7F**). These results support the model that miR-24-3p regulates *HMOX1* and *PRSS8* in CRC cells.

51 Regulation of *HMOX1* and *PRSS8* by miR-24-3p could occur through the canonical miRNA post-  
52 transcriptional gene targeting or by indirectly controlling the transcriptional activity of the two genes. To  
53 distinguish between these two possibilities, we leverage length extension chromatin run-on sequencing  
54 (leChRO-seq)<sup>28</sup> to assess changes in *HMOX1* and *PRSS8* transcription following miR-24-3p inhibition. Solely  
55 post-transcriptionally regulated genes will exhibit similar transcription (detected by leChRO-seq) between

scramble and miR-24-3p inhibitor treated cells, but altered steady-state gene expression (measured by RNA-seq). We show that *HMOX1* and *PRSS8* are transcribed at a similar rate between miR-24-3p inhibitor and scramble treated HCT116 cells, as determined by leChRO-seq (**Figure 7G, Table S5**). However, both genes do exhibit a significant elevation at the mRNA level as detected by RNA-seq (Figure 7G). Together, this data supports that miR-24-3p post-transcriptionally regulates *HMOX1* and *PRSS8* in a CRC context.

## Discussion

In this study we leveraged genetically modified mouse enteroids to characterize the impact of different combinations of CRC driver mutations on miRNA expression. We show that each of the genotypes investigated result in distinct miRNA profiles, with the exception of *Rspo3* (R) mutant enteroids which are comparable to wild-type (WT). The latter finding is consistent with previous studies that have shown R mutant enteroids exhibit similar RNA-seq profiles and cell morphology to WT enteroids<sup>31</sup>. We also define separate modules of miRNAs, each of which exhibits a unique pattern of expression across genotypes. We establish a publicly accessible resource, called ME-MIRAGE (<https://jwvillan.shinyapps.io/ME-MIRAGE/>), that allows users to evaluate mutation-specific relationships between miRNAs and genes. This database is a novel resource that provides information regarding the miRNA-mediated mechanisms by which combinations of somatic mutations can drive inter-tumor heterogeneity in CRC.

We highlight miR-375-3p as a mutation-dependent miRNA by showing that its expression is most strongly affected in the *Smad4*<sup>KO</sup> context. Interestingly, *Apc* (A) mutant enteroids exhibit significantly reduced (DESeq2 fold change > 1.5x, *padj* < 0.05) miR-375-3p expression compared to WT, however the magnitude of the decrease is much smaller relative to *KRS* and *KRPS* enteroids. This suggests that inhibition of miR-375-3p in CRC is strongly, but not solely, driven by changes in Tgf-B signaling. Studies in other cell contexts suggest that miR-375-3p can regulate Tgf-B signaling<sup>59,60</sup>. Future directions may explore the downstream effects and

30 potential feedback mechanisms by which miR-375-3p can regulate Tgf-B signaling. Additionally, previous  
31 studies in colon, stomach, and liver cancers have established miR-375-3p as a tumor suppressor<sup>47,61,62</sup>. This is in  
32 line with our recent report that shows miR-375 inhibits cell proliferation and migration in fibrolamellar  
33 carcinoma<sup>46</sup> and suppresses proliferation in intestinal stem cells<sup>63</sup>. In CRC, we suggest that a miR-375-3p  
34 mimic could be a candidate therapeutic approach especially for patients with somatic mutations that inhibit Tgf-  
35 B signaling.

36 The limited literature on the functional role of miR-24-3p in CRC offers mixed conclusions on whether  
37 miR-24-3p is an upregulated oncogenic miRNA<sup>64,65</sup> or a downregulated tumor suppressor<sup>66,67</sup>. This is likely due  
38 to a combination of pleiotropy in miR-24-3p function and the differences in experimental approaches across  
39 studies. In this study, we leverage multiple cell models in addition to TCGA data to support that miR-24-3p is  
40 upregulated in CRC and can function as an oncogenic miRNA. MiR-24-3p is located on the same pri-miRNA  
41 transcript as miR-27a-3p and miR-23a-3p<sup>68</sup>. We found that all three miRNAs are significantly elevated in  
42 TCGA primary colon tumor tissue and that genes downregulated in CRC are enriched for predicted targets of  
43 each of the miRNAs. MiR-27a-3p and miR-23a-3p also exhibit elevated expression (albeit not always  
44 statistically significant) in multiple mutant enteroids relative to WT. This upregulation in the miR-23a/miR-  
45 24/miR-27a cluster across datasets supports the literature that miR-24-3p is elevated in CRC. Finally, functional  
46 studies in HCT116 cells and enteroids demonstrate that inhibition of miR-24-3p suppresses CRC tumor cell  
47 apoptosis. Pleiotropy may explain the varied responses we observed in other CRC cell lines to miR-24-3p  
48 inhibition (**Supplementary Figure 4**). These results would suggest that, although miR-24-3p is upregulated in a  
49 wide range of genetic contexts, there is heterogeneity in the responsiveness of CRC cells to miR-24-3p  
50 inhibition.

51 We identify multiple genes that are up-regulated due to loss of post-transcriptional suppression after  
52 inhibition of miR-24-3p, most notably *HMOX1* and *PRSS8*, which are also prominently downregulated in  
53 TCGA colon tumors. Given miR-24-3p inhibition leads to increased apoptosis, we predict that *HMOX1* and  
54 *PRSS8* function as tumor suppressors in CRC. While *PRSS8* has clearly been shown to promote apoptosis in

multiple cancer contexts<sup>57,58</sup>, HMOX1 in regulating apoptosis appears to vary across tissues<sup>55,69,70</sup>. While the role of HMOX1 in the colon remains to be thoroughly evaluated, studies show that HMOX1 can function as a tumor suppressor in CRC by inhibiting tumor invasion<sup>71</sup> and metastasis<sup>72</sup>. Here we suggest that HMOX1 may also function as a tumor suppressor by increasing apoptosis, which merits more detailed future investigation.

In our KEGG 2019 pathway enrichment analysis of upregulated genes after miR-24-3p inhibitor treatment we identified ferroptosis, a form of cell death induced by excessive iron-induced lipid peroxidation. Cell count and CellTiter-glo analyses of HCT116 cells treated with a miR-24-3p inhibitor and ferroptosis inhibitor, ferrostatin, reveals no partial recovery of cell number at increasing concentrations of ferrostatin (**Supplementary Figure7**). One potential explanation for this data is that the poor stability of ferrostatin<sup>73</sup> prevented effective inhibition of ferroptosis. Another possibility is that miR-24-3p inhibition primed cells to undergo ferroptosis, but without the proper induction of ferroptosis, we do not observe a change in cell number at higher concentrations of ferrostatin. Treating cells with cisplatin, or another platinum-based therapy like oxaliplatin which is commonly used to treat CRC patients, may be an appropriate stimulus as cisplatin has been shown to induce apoptosis and ferroptosis in HCT116 cells<sup>74</sup>. If miR-24-3p does inhibit ferroptotic cell death, then treating CRC patients with a miR-24-3p inhibitor in conjunction with oxaliplatin may increase the efficacy of treatment and increase patient survival. We believe this idea merits further investigation.

Our results provide insight into the mechanisms by which somatic mutations alter miRNA profiles and how this can contribute to inter-tumor heterogeneity. Future studies in the field can build on our work by incorporating somatic mutations in genes that stratify established CRC subtypes<sup>3</sup> and observing changes in miRNA profiles. Further understanding of mutation-specific alterations to oncogenic and tumor suppressive miRNAs will be important for determining which miRNA-based therapeutics are most effective in different mutational contexts. Additionally, we hope to characterize how combinations of somatic mutations affect primary miRNA transcription to elucidate the transcriptional programs that contribute to changes in mature miRNA profiles. Ultimately, the identification of mutation-specific miRNAs will be important for identifying candidate miRNA therapeutics and the overall advancement of precision medicine for CRC patients.

30

## 31 **Experimental Procedures**

32

33 **Generation of genetically modified mouse enteroids.** The proximal half of the small intestine was isolated  
34 from 5-6 week-old C57BL/6 mice for crypt isolation. Cells were plated in Matrigel and grown for 3-4 weeks.  
35 Enteroids were then dissociated and transfected using the necessary Cre/CRISPR gene editors.

36 A, B, AKP, BKP: Cells with *Apc*<sup>Q883\*</sup> mutation (A) and *Ctnnb1*<sup>S33F</sup> (B) were generated using CRISPR  
37 base editing as described in Schatoff et al. (2019)<sup>29</sup>. Selection for *Apc*<sup>Q883\*</sup> and *Ctnnb1*<sup>S33F</sup> mutants was  
38 performed by culturing cells in the absence of RSPO1. *Kras*<sup>G12D</sup> (K) and *Trp53*<sup>-/-</sup> (P) mutations were generated  
39 using enteroids from the conditional LSL-*Kras*/p53fl/fl mouse model, as described in Dow et al., (2015)<sup>30</sup>. Cre  
40 was introduced to enteroids by transfection. Cells with *Trp53*<sup>-/-</sup> mutation were selected for by treating cells with  
41 10 μM Nutlin3. To ensure *Kras*<sup>G12D</sup> mutation, cells were then cultured in the absence of EGF.

42 KRP, KRS, KRPS: *Kras*<sup>G12D</sup> mutations (K) were generated by using enteroids derived from the *Kras*<sup>LSL-</sup>  
43 <sup>G12D</sup> conditional model as described in Jackson et al. (2001)<sup>75</sup>. Cre was introduced to enteroids by transfection.  
44 Cells with the *Kras*<sup>LSL-G12D</sup> allele were selected for by adding 1μM gefitinib to the culturing media. Cells with  
45 *Ptprk-Rspo3* fusion (R) were generated via CRISPR/Cas9 chromosome rearrangement as described in Han et  
46 al., (2017)<sup>31</sup>. Selection for *Ptprk-Rspo3* mutants was done by culturing cells in the absence of RSPO1. *Trp53*<sup>-/-</sup>  
47 (P) and *Smad4*<sup>KO</sup> (S) mutations were generated using CRISPR/Cas9 and single guide RNAs (sgRNA) as  
48 described in Han et al., (2020)<sup>12</sup>. Selection for *Trp53*<sup>-/-</sup> cells was completed by adding 5 μmol/L Nutlin-3 to the  
49 culturing media. Selection for *Smad4*<sup>KO</sup> cells was completed by adding 5 ng/mL TGFβ1 to the culturing media.

50

51 **Trizol LS RNA isolation.** Cells were treated with 250 μL of cold 1X NUN Lysis Buffer (20 mM HEPES, 7.5  
52 mM MgCl<sub>2</sub>, 0.2 mM EDTA, 0.3 M NaCl, 1 M Urea, 1% NP-40, 1mM DTT, and 50 units/mL SUPERase In

53 RNase Inhibitor (ThermoFisher Scientific, Waltham, MA), and 1X 50X Protease Inhibitor Cocktail (Roche,  
54 Branchburg, NJ)). Lysate was vortexed vigorously for 1 minute to physically lyse cells. Samples were incubated  
55 for 30 minutes in Thermomixer C at 12°C at 1500 rpm. Chromatin was pelleted out by centrifuging samples for  
56 12,500 xg for 30 minutes at 4°C. Supernatant containing RNA was removed from the tube and added to clean  
57 1.5 mL centrifuge tube along with 750 µL Trizol LS (Life Technologies, 10296-010). Samples were vortexed  
58 and stored at -80°C until RNA isolation. Samples were thawed and allowed to incubate for 5 minutes. 200 µL of  
59 chloroform was added to each tube and vortexed for 20 seconds. Following a three-minute incubation, samples  
60 were centrifuged at 17,000 xg, 4°C for 5 minutes. Aqueous layer was transferred to clean 1.5 mL centrifuge  
61 tube containing 2.5 µL of GlycoBlue. 1 mL of ice cold, 100% ethanol was added to aqueous phase and samples  
62 were then vortexed. Samples were then centrifuged at 17,000 xg at 4°C for 15 minutes. Supernatant was  
63 removed and pellet was washed with 75% ice cold ethanol. Samples were vortexed and RNA was pelleted by  
64 centrifuging at 17,000 xg at 4°C for 5 minutes. Supernatant was removed and RNA pellets were allowed to dry  
65 for 10 minutes at room temperature. RNA was resuspended in 30 µL of RNase-free water.

56  
57 **Small RNA library preparation and sequencing.** Total RNA was isolated using the Total RNA Purification  
58 Kit (Norgen Biotek, Thorold, ON, Canada) according to manufacturer's instructions or Trizol LS method  
59 described above. RNA purity and concentration was determined using the Nanodrop 2000 (Thermo Fisher  
60 Scientific, Waltham, MA). RNA integrity was quantified using the 4200 TapeStation (Agilent Technologies,  
61 Santa Clara, CA) or Fragment Analyzer Automated CE System (Advanced Analytical Technologies, Ankeny,  
62 IA). Libraries were prepared at the Genome Sequencing Facility of the Greehey Children's Cancer Research  
63 Institute (University of Texas Health Science Center, San Antonio, TX) using the CleanTag Small RNA Library  
64 Prep kit (TriLink Biotechnologies, San Diego, CA). Libraries were then sequenced on the HiSeq2000 platform  
65 (Illumina, San Diego, CA).



77 **RNA library preparation and sequencing.** Total RNA was isolated using the Total RNA Purification Kit  
78 (Norgen Biotek, Thorold, ON, Canada) according to the manufacturer's instructions or using the Trizol LS  
79 method described above. RNA purity and concentration was determined using the Nanodrop 2000 (Thermo  
80 Fisher Scientific, Waltham, MA). RNA integrity was quantified using the 4200 TapeStation (Agilent  
81 Technologies, Santa Clara, CA) or Fragment Analyzer Automated CE System (Advanced Analytical  
82 Technologies, Ankeny, IA). Libraries were prepared using the NEBNext Ultra II Directional Library Prep Kit  
83 following Ribosomal Depletion (mouse enteroid RNA) or PolyA enrichment (HCT116 RNA) at the Cornell  
84 Transcriptional Regulation and Expression Facility (Cornell University, Ithaca, NY). Libraries were then  
85 sequenced using the NextSeq500 platform (Illumina, San Diego, CA).

86  
87 **Small RNA-seq Analysis.** Read quality was assessed using FastQC. Trimming, mapping and quantification  
88 was performed using miRquant 2.0 as described in Kanke et al., (2016)<sup>32</sup>. In short, reads were trimmed using  
89 Cutadapt, aligned to the genome using Bowtie and SHRiMP, and aligned reads were quantified and normalized  
90 using DESeq2<sup>50</sup>. We accounted for sequencing batch, RIN, and genotype in our model. Defining groups of  
91 miRNAs with similar patterns of expression across genotypes: Raw miRNA count matrices produced by  
92 miRquant were analyzed using a likelihood ratio-test from DESeq2. miRNA annotations in the 5000s are  
93 degradation products and removed from the analysis, and miRNAs with an adjusted p-value greater than 0.05  
94 and baseMean expression less than 500 were discarded. An rlog transformation was applied to the raw counts  
95 and batch effects were removed using the limma function removeBatchEffects. Clusters of miRNAs with  
96 similar expression patterns were identified using the DEGreport (v1.26.0) function degPatterns (minc = 5). Only  
97 clusters containing greater than five miRNAs were considered. Fold change heatmaps: Transformation and  
98 batch correction of miRNA expression and grouping of miRNAs is described above. Normalized expression of  
99 miRNAs for each mutant enteroid sample was subtracted from average WT expression and heatmaps were  
100 made using the R package pheatmap (v1.0.12).

01

02 **RNA-seq Analysis.** Read quality was assessed using FastQC. RNA-seq reads were aligned to either the mm10  
03 genome release for mouse enteroids or the hg38 genome release for the human HCT116 cells using STAR  
04 (v2.7.9a). Quantification was performed with Salmon (v1.4.0) using the GENCODE release 25 annotations.  
05 Normalization and differential expression analyses were performed utilizing DESeq2 (v1.30.1). We accounted  
06 for cell culture batch effects, RIN, and genotype in our model. Enrichr was used for KEGG pathway analysis as  
07 described in Chen et al. (2013)<sup>52</sup>. miRhub analysis was performed as described in Baran-Gale et al. (2013)<sup>51</sup>. In  
08 short, miRhub scans input gene lists for miRNA binding sites defined by TargetScan v5.2<sup>76</sup>. For our analyses,  
09 we filtered for binding sites that are conserved in mice and at least one of the following species (cons1): human,  
10 rat, dog and/or chicken. miRNA-gene scores were generated based on seed sequence strength, conservation, and  
11 frequency of target sites in the 3'-UTR while controlling for 3' UTR length. These scores were added together  
12 for each miRNA to generate a cumulative value that represents the miRNA targeting score. A Monte Carlo  
13 simulation repeated this analysis 1000x using lists of randomly selected genes. An empirical p-value was then  
14 calculated for each miRNA by comparing the targeting score from input gene lists to the targeting scores  
15 calculated using the lists consisting of randomly selected genes.

16

17 **Quantitative PCR.** Total RNA from HCT116 cells was extracted using the Total RNA Purification Kit  
18 (Norgen Biotek, Thorold, ON, Canada) according to manufacturer's instructions. Reverse-transcription for  
19 miRNA expression was performed using the Taqman MicroRNA Reverse Transcription Kit (ThermoFisher  
20 Scientific, Waltham, MA). Quantification of miRNA expression was done using the TaqMan Universal PCR  
21 Master Mix (ThermoFisher Scientific, Waltham, MA). miRNA expression was normalized to U6 (assay ID:  
22 001973). miRNA Taqman assays: miR-375-3p (assay ID: 000564), miR-24-3p (assay ID: 000402). Reverse-  
23 transcription for gene expression was performed using the High-Capacity RNA-to-cDNA kit (ThermoFisher  
24 Scientific, Waltham, MA). Quantification of gene expression was done using the TaqMan Gene Expression

25 Master Mix (ThermoFisher Scientific, Waltham, MA). Gene expression was normalized to *RPS9* (assay ID:  
26 Hs02339424\_g1). Gene Taqman assays: *HMOX1* (assay ID: Hs01110250\_m1), *PRSS8* (assay ID:  
27 Hs00173606\_m1), *Rps9* (assay ID: Mm00850060\_s1), *Fnl* (assay ID: Mm01256744\_m1), *Coll1a1* (assay ID:  
28 Mm00801666\_g1). Measurements were taken using the BioRad CFX96 Touch Real Time PCR Detection  
29 System (Bio-Rad Laboratories, Richmond, CA).

31 **The Cancer Genome Atlas (TCGA) Analysis.** Data Download: RNA-seq High Throughput Sequencing  
32 (HTSeq) counts files for 382 primary colon tumor and 39 solid normal tissue samples was downloaded using  
33 the NIHGDC Data Transfer Tool. Normalization and differential expression were identified using DESeq2. For  
34 our miRhub analysis, we filtered for binding sites that are conserved in humans and at least two of the following  
35 species (cons2): mouse, rat, dog and/or chicken. miRNA quantification files, that used mirbase21, for 371  
36 primary colon tumor and 8 solid normal tissue samples were also downloaded using NIHGDC Data Transfer  
37 Tool. Of the 371 colon tumor samples with miRNA data, 326 had simple somatic mutation (TCGA v32.0) and  
38 copy number variation (CNV; TCGA v31.0) information. Tumor samples were assigned *APC* (A), *TP53* (P),  
39 and *SMAD4* (S) mutations if they contained a non-synonymous mutation and/or CNV loss for a given gene. For  
40 A, P, and S designations, samples with a CNV gain and a non-synonymous mutation were not included.  
41 Mutations in *CTNNB1* (B) and *KRAS* (K) were assigned to tumor samples with a non-synonymous mutation  
42 and/or CNV gain for a given gene. For B and K designations, samples with a CNV loss and a non-synonymous  
43 mutation were not included.

44 TCGA small RNA-seq across cancer types: Small RNA sequencing expression data was downloaded  
45 from TCGA for 23 tumor types using the R package TCGA-assembler. Expression was reported as the reads per  
46 million mapped to miRNAs (RPMMM). Log<sub>2</sub> fold change was calculated by dividing the tumor expression by  
47 the expression in non-tumor tissue followed by log<sub>2</sub> transformation.

19 **Mouse enteroid culture.** Crypts from the jejunum of 3-5 month old male B62J mice were isolated as described  
20 in Peck et al., (2017)<sup>63</sup>. Isolated crypts were plated in Reduced Growth Factor Matrigel (Corning, Corning, NY,  
21 catalog #: 356231) on Day 0. Advanced DMEM/F12 (Gibco, Gaithersburg, MD, catalog #: 12634-028) was  
22 used for culture and supplemented with GlutaMAX (Gibco, Gaithersburg, MD, catalog #:35050-061), Pen/Strep  
23 (Gibco, Gaithersburg, MD, catalog #:15140), HEPES (Gibco, Gaithersburg, MD, catalog #:15630-080), N2  
24 supplement (Gibco, Gaithersburg, MD, catalog #:17502-048), 50 ng/mL EGF (R&D Systems, Minneapolis,  
25 MN, catalog #: 2028-EG), 100 ug/mL Noggin (PeproTech, Rocky Hill, NJ, catalog #: 250-38), 250 ng/uL  
26 murine R-spondin (R&D Systems, catalog #: 3474-RS-050), and 10 mM Y27632 (Enzo Life Sciences,  
27 Farmingdale, NY, catalog #:ALX270-333-M025) miR-24-3p LNA inhibitor treatment: Cells were transfected  
28 with hsa-miR-24-3p miRCURY LNA miRNA Power Inhibitor (Qiagen, Germantown, MD, catalog #:  
29 YI04101706-DDA) or Power Negative Control A (Qiagen, Germantown, MD, catalog #: YI00199006-DDA) to  
30 a final concentration of 500 nM on Day 0 using gymnosis. Media was changed and cells were treated with 250  
31 nM miR-24 LNA inhibitor or scramble. Cells were harvested and fixed in 4% (v/v) paraformaldehyde on Day 5.  
32 Tgf-B treatment: Recombinant Human TGF-B1 (PeproTech catalog #: 100-21) was added to enteroid media on  
33 Day 0 for final concentration of 0, 0.5, or 1 ng/mL. Enteroids were harvested on Day 3.

34  
35 **Cell Line Transfection:** All cell lines were plated in DMEM+10% FBS media. HCT116 cells were plated at a  
36 density of 3,400 cells/well in a 96-well plate. Caco-2 cells were plated at a density of 20,000 cells/well in a 96-  
37 well plate. HT-29 cells were plated at a density of 3,400 to 6,800 cells/well in a 96-well plate. SW48 cells were  
38 plated at a density of 10,000 cells/well in a 96-well plate. Cells incubated for 24 hours in a 37 °C incubator.  
39 Cells were transfected with hsa-miR-24-3p miRCURY LNA miRNA Power Inhibitor (Qiagen, Germantown,  
40 MD, catalog #: YI04101706-DDA) or scramble control to a final concentration of 100 nM using Lipofectamine  
41 3000 (ThermoFisher Scientific, Waltham, MA, catalog #: L3000-008) according to manufacturer's instructions.  
42 Either Power Negative Control A (Qiagen, Germantown, MD, catalog #: YI00199006-DDA) or Negative  
43 Control miRCURY LNA miRNA Mimic (Qiagen, Germantown, MD, catalog #: YM00479902-AGA) was used

74 for scramble control. After 24-hours, media was replaced with complete media. Ferrostatin-1 treatment: At the  
75 time of LNA transfection, cells were also treated with 0, 0.5, 2, 5, or 10  $\mu\text{M}$  Ferrostatin-1 (Sigma-Aldrich, St.  
76 Louis, MO, catalog #: SML0583-5MG). After 24-hours, media was replaced with complete media. Cells were  
77 harvested 48-hours post-transfection.

78  
79 **Cell count assay.** 48-hours following transfection, cells in 96-well plate were washed with PBS and treated  
80 with 50  $\mu\text{L}$  trypsin. Cells incubated for 5 minutes in 37 °C incubator. Cells were resuspended using 150  $\mu\text{L}$   
81 complete media and transferred to clean 1.5 mL Eppendorf tubes. Cell concentration was calculated by adding  
82 10  $\mu\text{L}$  of cell suspension to chip for Biorad TC20 Automated Cell Counter (Bio-Rad Laboratories, Richmond,  
83 CA).

84  
85 **CellTiter-Glo assays.** 48-hours following transfection, cells in 96-well plate were incubated at room  
86 temperature for 30 minutes. 100  $\mu\text{L}$  of room temperature CellTiter-Glo reagent (Promega, Madison, WI) was  
87 added to each well and placed on cell rocker for 2 minutes to lyse the cells. Afterwards, plate was incubated at  
88 room temperature for 10 minutes. Luminescent signal was quantified using a Synergy 2 Microplate Reader  
89 (Biotek, Winooski, VT; area scan; Integration = 0:00:50; Sensitivity = 135).

90  
91 **EdU Assay.** 48-hours following transfection, cells in 96-well plate were incubated with 10  $\mu\text{M}$  EdU at 37 °C in  
92 complete media for 1 hour. Cells were then fixed with 4% paraformaldehyde for 20 minutes at room  
93 temperature and permeabilized using 0.5% Triton X-100 in PBS for 20 minutes. The Invitrogen Click-iT Plus  
94 EdU AlexaFluor 488 Imaging Kit (Invitrogen, Waltham, MA, C10637) was used to detect EdU according to  
95 manufacturer's instructions. Nuclei were stained using DAPI (ThermoFisher Scientific, Waltham, MA, catalog  
96 #: D1306) and imaged using ZOE Fluorescent Cell Image (Bio-Rad Laboratories, Richmond, CA). Images were

analyzed using FIJI. For EdU positive cells, threshold value was set to 10. For analyzing particles, counted those particles with size = 250-Infinity and circularity = 0.4-1.

**TUNEL Assay.** 48-hours following transfection, cells in 96-well plate were washed twice with PBS and fixed using 4% paraformaldehyde for 15 minutes at room temperature. Permeabilization was performed by using 0.5% Triton X-100 in PBS for 20 minutes. Cells were washed twice with deionized water. Positive control wells were treated with 1X DNase I, Amplification Grade (ThermoFisher Scientific, Waltham, MA, catalog #: 18068-015) solution according to manufacturer's instructions. Labeling and detection of apoptotic cells was completed using the Invitrogen Click-iT Plus TUNEL Assay for In Situ Apoptosis Detection 488 kit (Invitrogen, Waltham, MA, catalog #: C10617) according to manufacturer's instructions. Nuclei were stained using DAPI (ThermoFisher Scientific, Waltham, MA, catalog #: D1306) and imaged using ZOE Fluorescent Cell Image (Bio-Rad Laboratories, Richmond, CA). Images were analyzed using FIJI. For TUNEL positive cells, threshold value was set to 14. For analyzing particles, counted those particles with size = 250-Infinity and circularity = 0.4-1.

**LNA24 transfection with leChRO-seq and RNA-seq cross comparison.** HCT116 cells were plated in DMEM+10% FBS media at a density of 102,000 cells/well in a 6-well plate. Cells incubated for 24 hours in a 37 °C incubator and transfected with hsa-miR-24-3p miRCURY LNA miRNA Power Inhibitor (Qiagen, Germantown, MD, catalog #: YI04101706-DDA) or Power Negative Control A (Qiagen, Germantown, MD, catalog #: YI00199006-DDA) to a final concentration of 100 nM using Lipofectamine 3000 (ThermoFisher Scientific, Waltham, MA, catalog #: L3000-008). After 24-hours, media was replaced with complete media. After 48-hours post-transfection, cells were resuspended using 0.25% Trypsin (ThermoFisher Scientific, Waltham, MA, catalog #: 25200-114). Wells from the same treatment condition were pooled together into a single tube during each experimental replicate. 20,000 cells were isolated for total RNA isolation using the

21 Total RNA Purification Kit (Norgen Biotek, Thorold, ON, Canada) according to manufacturer's instructions.

22 RNA-seq and quantitative qPCR were performed as described previously.

23  
24 The remaining cells (450,000+ cells) were flash frozen using 100% EtOH and dry ice until utilized for  
25 Length Extension Chromatin Run-On Sequencing (leChRO-seq) as previously described<sup>28,77</sup>. Chromatin  
26 Isolation: Chromatin was isolated by treating cell pellet with 750 $\mu$ L 1X NUN buffer (20 mM HEPES, 7.5 mM  
27 MgCl<sub>2</sub>, 0.2 mM EDTA, 0.3 M NaCl, 1 M Urea, 1% NP-40, 1mM DTT, and 50 units/mL RNase Cocktail  
28 Enzyme (ThermoFisher Scientific, Waltham, MA), and 1X 50X Protease Inhibitor Cocktail (Roche,  
29 Branchburg, NJ)). Samples were vortexed vigorously for 1 minute to physically lyse the samples. An additional  
30 750 $\mu$ L of 1X NUN buffer was added and samples were vortexed again for 1 minute. Cell lysates were incubated  
31 in an Eppendorf Thermomixer (Eppendorf, Hamburg, Germany) at 12°C and shaken at 2000 rpm for 30  
32 minutes. Chromatin was pelleted by centrifuging samples at 12,500 x g for 30 minutes at 4 °C. Supernatant was  
33 removed and chromatin was washed 3 times with 1 mL 50 mM Tris-HCl (pH=7.5) containing 40 units/mL  
34 SUPERase In RNase Inhibitor. After removing supernatant from final wash, 50  $\mu$ L storage buffer was added to  
35 chromatin and samples were transferred to 1.5 mL Bioruptor Microtubes with Caps for Bioruptor (Diagenode,  
36 Denville, NJ). Samples were then loaded into Pico Biorupter (Diagenode, Denville, NJ) and sonicated on high  
37 for 10 cycles (1 cycle = 30 seconds on, 30 seconds off). Sonication was repeated until chromatin was  
38 solubilized (max 3 cycles). Samples were stored at -80 °C until further processing.

39 ChRO-seq library preparation and sequencing: 50  $\mu$ L of 2X Biotin-11 Reaction mix (10 mM Tris-HCl  
40 pH=8.0, 5 mM MgCl<sub>2</sub>, 1 mM DTT, 300 mM KCl, 400  $\mu$ M ATP, 0.8  $\mu$ M CTP, 400  $\mu$ M GTP, 400  $\mu$ M UTP, 40  
41  $\mu$ M Biotin-11-CTP (Perkin Elmer, Waltham, MA, NEL542001EA), 100 ng yeast tRNA (VWR, Radnor, PA,  
42 80054-306), 0.8 units/ $\mu$ L SUPERase In RNase Inhibitor, 1% sarkosyl) was added to 50  $\mu$ L solubilized  
43 chromatin. Samples were placed in Eppendorf Thermomixer at 37°C for 5 minutes and shaken at 750 rpm. Run-  
44 on was halted by adding 300  $\mu$ L Trizol LS (Life Technologies, 10296-010) and allowing the samples to

15 incubate at room temperature for 3 minutes. RNA was purified using streptavidin beads (New England Biolabs,  
16 Ipswich, MA, S1421S) and ethanol precipitated with the co-precipitate GlycoBlue (Ambion, AM9515).  
17 Ligation of the 3' adapter was done using the T4 RNA Ligase 1 (New England Biolabs, Ipswich, MA,  
18 M0204L). Ligation of 5' adaptor required (i) Removal of the 5' cap using RNA 5' pyrophosphohydrolase  
19 (RppH, New England Biolabs, Ipswich, MA, M0356S) (ii) Phosphorylation of the 5' end using T4  
20 polynucleotide kinase (New England Biolabs, Ipswich, MA, M0201L) (iii) 5' adaptor ligation using T4 RNA  
21 Ligase 1 (New England Biolabs, Ipswich, MA, M0204L). Generation of cDNA was done by using Superscript  
22 III Reverse Transcriptase (Life Technologies, 18080-044). Amplification was completed by using Q5 High-  
23 Fidelity DNA Polymerase (New England Biolabs, Ipswich, MA, M0491L). Single-end sequencing (5' end, 75  
24 bp) was performed at the Cornell Biotechnology Research Center using the NextSeq500 (Illumina, San Diego,  
25 CA) platform. Data analysis: To prepare bigwig files for further analyses, leChRO-seq libraries were aligned to  
26 the hg38 genome using the proseq2.0 pipeline (<https://github.com/Danko-Lab/proseq2.0>) in single-end mode  
27 (Chu et al., 2018)<sup>28</sup>. Annotation of leChRO-seq reads excluded reads within 500 bp downstream of the  
28 transcription start site (TSS) to account for RNA polymerase pausing at the gene promoters. Genes <1000 bp  
29 were then excluded to account for the bias resulting from short gene bodies. ChRO-seq reads were normalized  
30 and differential expression analysis was performed using DESeq2.

31  
32 **Statistics.** All statistical tests used are detailed in the figure legends. Either two-tailed Welch t-test (calculated  
33 using R) or two-tailed Student's t-test (calculated using excel) was applied to datasets that were normalized  
34 (DESeq2, log2, rlog). Significance for data sets that did not statistically differ from a normal distribution  
35 (Shapiro-Wilk test p-value > 0.05) was calculated using a t-test. A two-sided Wilcoxon test was applied to non-  
36 parametric data sets unless where indicated. P-values < 0.05 are considered statistically significant. NS. = not  
37 significant, \* = p<0.05, \*\* = p<0.01, \*\*\* = p<0.001.



## 59 Data availability

70  
71 The dataset(s) supporting the conclusions of this article are available in the Gene Expression Omnibus (GEO)  
72 repository, accession GSE188212 <https://www.ncbi.nlm.nih.gov/geo/query/acc.cgi?acc=GSE188212>. DESeq2  
73 differential expression statistics are available at <https://jwvillan.shinyapps.io/ME-MIRAGE/>.

## 75 References.

- 76 1. Sung, H.; Ferlay, J.; Siegel, R.L.; Laversanne, M.; Soerjomataram, I.; Jemal, A.; Bray, F. Global Cancer  
77 Statistics 2020: GLOBOCAN Estimates of Incidence and Mortality Worldwide for 36 Cancers in Countries.  
78 *CA: A Cancer Journal for Clinicians* **2021**, 71, 209–249. doi:10.3322/caac.21660.
- 79 2. Network, T.C.G.A. Comprehensive molecular characterization of human colon and rectal cancer. *Nature*  
30 **2012**, 487, 330 – 337. doi:10.1038/nature11252.
- 31 3. Dienstmann, R.; Wang, X.; s, A.e.l.d.R.e.; Schlicker, A.; Sonesson, C.; Marisa, L.; Roepman, P.;  
32 Nyamundanda, G.; Angelino, P.; Bot, B.M.; et al. The consensus molecular subtypes of colorectal cancer.  
33 *Nature Medicine* **2015**, pp. 1 – 13. doi:10.1038/nm.3967.
- 34 4. Molinari, C.; Marisi, G.; Passardi, A.; Matteucci, L.; Maio, G.D.; Ulivi, P. Heterogeneity in Colorectal  
35 Cancer: A Challenge for Personalized Medicine? *International Journal of Molecular Sciences* **2018**, 19,  
36 3733. doi:10.3390/ijms19123733.
- 37 5. Punt, C.J.A.; Koopman, M.; Vermeulen, L. From tumour heterogeneity to advances in precision treatment  
38 of colorectal cancer. *Nature reviews. Clinical oncology* **2017-04**, 14, 235 – 246.  
39 doi:10.1038/nrclinonc.2016.171.
- 40 6. Roock, W.D.; Claes, B.; Bernasconi, D.; Schutter, J.D.; Biesmans, B.; Fountzilias, G.; Kalogeras, K.T.;  
41 Kotoula, V.; Papamichael, D.; Laurent-Puig, P.; et al. Effects of KRAS, BRAF, NRAS, and PIK3CA  
42 mutations on the efficacy of cetuximab plus chemotherapy in chemotherapy-refractory metastatic colorectal

- 33 cancer: a retrospective consortium analysis. *The Lancet Oncology* **2010**, 11, 753–762. doi:10.1016/s1470-  
34 2045(10)70130-3.
- 35 7. Sen, M.; Wang, X.; Hamdan, F.H.; Rapp, J.; Eggert, J.; Kosinsky, R.L.; Wegwitz, F.; Kutschat, A.P.;  
36 Younesi, F.S.; Gaedcke, J.; et al. ARID1A facilitates KRAS signaling-regulated enhancer activity in an  
37 AP1-dependent manner in colorectal cancer cells. *Clinical Epigenetics* **2019**, 11, 92. doi:10.1186/s13148-  
38 019-0690-5.
- 39 8. Rahnamoun, H.; Lu, H.; Duttke, S.H.; Benner, C.; Glass, C.K.; Lauberth, S.M. Mutant p53 shapes the  
40 enhancer landscape of cancer cells in response to chronic immune signaling. *Nature Communications* **2017**,  
41 pp. 1 – 14. doi:10.1038/s41467-017-01117-y.
- 42 9. Necela, B.M.; Carr, J.M.; Asmann, Y.W.; Thompson, E.A. Differential Expression of MicroRNAs in  
43 Tumors from Chronically Inflamed or Genetic (APCMin/+) Models of Colon Cancer. *PLoS ONE* **2011**, 6,  
44 e18501. doi:10.1371/journal.pone.0018501.
- 45 10. Bailey, J.M.; Hendley, A.M.; Lafaro, K.J.; Pruski, M.A.; Jones, N.C.; Alsina, J.; Younes, M.; Maitra, A.;  
46 McAllister, F.; Iacobuzio-Donahue, C.A.; et al. p53 mutations cooperate with oncogenic Kras to promote  
47 adenocarcinoma from pancreatic ductal cells. *Oncogene* **2016**, 35, 4282 – 4288. doi:10.1038/onc.2015.441.
- 48 11. Trobridge, P.; Knoblaugh, S.; Washington, M.K.; Munoz, N.M.; Tsuchiya, K.D.; Rojas, A.; Song, X.;  
49 Ulrich, C.M.; Sasazuki, T.; Shirasawa, S.; et al. TGF-beta receptor inactivation and mutant Kras induce  
50 intestinal neoplasms in mice via a beta-catenin-independent pathway. *Gastroenterology* **2009-05**, 136, 1680  
51 – 8.e7. doi:10.1053/j.gastro.2009.01.066.
- 52 12. Han, T.; Goswami, S.; Hu, Y.; Tang, F.; Zafra, M.P.; Murphy, C.; Cao, Z.; Poirier, J.T.; Khurana, E.;  
53 Elemento, O.; et al. Lineage reversion drives WNT independence in intestinal cancer. *Cancer discovery*  
54 **2020**, pp. CD–19–1536. doi:10.1158/2159-8290.cd-19-1536.
- 55 13. Liu, F.; Hon, G.C.; Villa, G.R.; Turner, K.M.; Ikegami, S.; Yang, H.; Ye, Z.; Li, B.; Kuan, S.; Lee, A.Y.; et  
56 al. EGFR Mutation Promotes Glioblastoma through Epigenome and Transcription Factor Network  
57 Remodeling. *Molecular Cell* **2015**, 60, 307 – 318. doi:10.1016/j.molcel.2015.09.002.

- 18 14. Ibrahim, H.; Lim, Y.C. KRAS-associated microRNAs in colorectal cancer. *Oncology Reviews* **2020**, *14*,  
19 454. doi:10.4081/oncol.2020.454.
- 20 15. Brown, D.; Rahman, M.; Nana-Sinkam, S.P. MicroRNAs in Respiratory Disease. A Clinician's Overview.  
21 *Annals of the American Thoracic Society* **2014**, *11*, 1277–1285. doi:10.1513/annalsats.201404-179fr.
- 22 16. Fridrichova, I.; Zmetakova, I. MicroRNAs Contribute to Breast Cancer Invasiveness. *Cells* **2019**, *8*, 1361.  
23 doi:10.3390/cells8111361.
- 24 17. Hao, N.B.; He, Y.F.; Li, X.Q.; Wang, K.; Wang, R.L. The role of miRNA and lncRNA in gastric cancer.  
25 *Oncotarget* **2015**, *5*, 81572–81582. doi:10.18632/oncotarget.19197.
- 26 18. Ma, L.; Reinhardt, F.; Pan, E.; Soutschek, J.; Bhat, B.; Marcusson, E.; Teruya-Feldstein, J.; Bell, G.W.;  
27 Weinberg, R.A. Therapeutic silencing of miR-10b inhibits metastasis in a mouse mammary tumor model.  
28 *Nature biotechnology* **2010**, *28*, 341–347. doi:10.1038/nbt.1618.
- 29 19. Teplyuk, N.M.; Uhlmann, E.J.; Gabriely, G.; Volfovsky, N.; Wang, Y.; Teng, J.; Karmali, P.; Marcusson, E.;  
30 Peter, M.; Mohan, A.; et al. Therapeutic potential of targeting microRNA-10b in established intracranial  
31 glioblastoma: first steps toward the clinic. *EMBO molecular medicine* **2016**, *8*, 268–87.  
32 doi:10.15252/emmm.201505495.
- 33 20. Hanna, J.; Hossain, G.S.; Kocerha, J. The Potential for microRNA Therapeutics and Clinical Research.  
34 *Frontiers in Genetics* **2019**, *10*, 478. doi:10.3389/fgene.2019.00478.
- 35 21. Seto, A.G.; Beatty, X.; Lynch, J.M.; Hermreck, M.; Tetzlaff, M.; Duvic, M.; Jackson, A.L. Cobomarsen, an  
36 oligonucleotide inhibitor of miR-155, co-ordinately regulates multiple survival pathways to reduce cellular  
37 proliferation and survival in cutaneous T-cell lymphoma. *British Journal of Haematology* **2018**, *183*, 428–  
38 444. doi:10.1111/bjh.15547.
- 39 22. Cojocneanu, R.; Braicu, C.; Raduly, L.; Jurj, A.; Zanoaga, O.; Magdo, L.; Irimie, A.; Muresan, M.S.;  
40 Ionescu, C.; Grigorescu, M.; et al. Plasma and Tissue Specific miRNA Expression Pattern and Functional  
41 Analysis Associated to Colorectal Cancer Patients. *Cancers* **2020**, *12*, 843. doi:10.3390/cancers12040843.

23. Falzone, L.; Scola, L.; Zanghì, A.; Biondi, A.; Cataldo, A.D.; Libra, M.; Candido, S. Integrated analysis of colorectal cancer microRNA datasets: identification of microRNAs associated with tumor development. *Aging (Albany NY)* **2018**, 10, 1000–1014. doi:10.18632/aging.101444.
24. Bandrés, E.; Cubedo, E.; Agirre, X.; Malumbres, R.; Zárate, R.; Ramirez, N.; Abajo, A.; Navarro, A.; Moreno, I.; Monzó, M.; et al. Identification by Real-time PCR of 13 mature microRNAs differentially expressed in colorectal cancer and non-tumoral tissues. *Molecular Cancer* **2006**, 5, 29–29. doi:10.1186/1476-4598-5-29.
25. To, K.K.; Tong, C.W.; Wu, M.; Cho, W.C. MicroRNAs in the prognosis and therapy of colorectal cancer: From bench to bedside. *World Journal of Gastroenterology* **2018**, 24, 2949–2973. doi:10.3748/wjg.v24.i27.2949.
26. Berg, K.C.G.; Eide, P.W.; Eilertsen, I.A.; Johannessen, B.; Bruun, J.; Danielsen, S.A.; Bjørnslett, M.; Meza-Zepeda, L.A.; Eknæs, M.; Lind, G.E.; et al. Multi-omics of 34 colorectal cancer cell lines - a resource for biomedical studies *Molecular Cancer* **2017**. pp. 1 – 16. doi:10.1186/s12943-017-0691-y.
27. Crespo, M.; Vilar, E.; Tsai, S.Y.; Chang, K.; Amin, S.; Srinivasan, T.; Zhang, T.; Pipalia, N.H.; Chen, H.J.; Witherspoon, M.; et al. Colonic organoids derived from human induced pluripotent stem cells for modeling colorectal cancer and drug testing. *Nature Medicine* **2017**, 23, 878 – 884. doi:10.1038/nm.4355.
28. Chu, T.; Rice, E.J.; Booth, G.T.; Salamanca, H.H.; Wang, Z.; Core, L.J.; Longo, S.L.; Corona, R.J.; Chin, L.S.; Lis, J.T.; et al. Chromatin run-on and sequencing maps the transcriptional regulatory landscape of glioblastoma multiforme. *Nature Genetics* **2018-11**, 50, 1553 – 1564. doi:10.1038/s41588-018-0244-3.
29. Schatoff, E.M.; Goswami, S.; Zafra, M.P.; Foronda, M.; Shusterman, M.; Leach, B.I.; Katti, A.; Diaz, B.J.; Dow, L.E. Distinct CRC-associated APC mutations dictate response to Tankyrase inhibition. *Cancer discovery* **2019**, pp. CD–19–0289. doi:10.1158/2159-8290.cd-19-0289.
30. Dow, L.E.; O'Rourke, K.P.; Simon, J.; Tschaharganeh, D.F.; Es, J.H.v.; Clevers, H.; Lowe, S.W. Apc Restoration Promotes Cellular Differentiation and Reestablishes Crypt Homeostasis in Colorectal Cancer. *Cell* **2015**, 161, 1539 – 1552. doi:10.1016/j.cell.2015.05.033.

- 57 31. Han, T.; Schatoff, E.M.; Murphy, C.; Zafra, M.P.; Wilkinson, J.E.; Elemento, O.; Dow, L.E. R-Spondin  
58 chromosome rearrangements drive Wnt-dependent tumour initiation and maintenance in the intestine.  
59 *Nature Communications* **2017**, 8, 1 – 12. doi:10.1038/ncomms15945.
- 70 32. Kanke, M.; Baran-Gale, J.; Villanueva, J.; Sethupathy, P. miRquant 2.0: an Expanded Tool for Accurate  
71 Annotation and Quantification of MicroRNAs and their isomiRs from Small RNA-Sequencing Data.  
72 *Journal of integrative bioinformatics* **2016**, 13, 307. doi:10.2390/biecoll-jib-2016-307.
- 73 33. Pantano, L. DEG Report: Report of DEG analysis. doi:10.18129/B9.bioc.DEGreport.
- 74 34. Lu, D.; Yao, Q.; Zhan, C.; Le-Meng, Z.; Liu, H.; Cai, Y.; Tu, C.; Li, X.; Zou, Y.; Zhang, S. MicroRNA-  
75 146a promote cell migration and invasion in human colorectal cancer via carboxypeptidase M/src-FAK  
76 pathway. *Oncotarget* **2017**, 8, 22674–22684. doi:10.18632/oncotarget.15158.
- 77 35. Khorrami, S.; Hosseini, A.Z.; Mowla, S.J.; Soleimani, M.; Rakhshani, N.; Malekzadeh, R. MicroRNA-146a  
78 induces immune suppression and drug-resistant colorectal cancer cells. *Tumor Biology* **2017**, 39,  
79 1010428317698365. doi:10.1177/1010428317698365.
- 30 36. Kawaguchi, Y.; Kopetz, S.; Newhook, T.E.; Bellis, M.D.; Chun, Y.S.; Tzeng, C.W.D.; Aloia, T.A.;  
31 Vauthey, J.N. Mutation Status of RAS, TP53, and SMAD4 is Superior to Mutation Status of RAS Alone for  
32 Predicting Prognosis after Resection of Colorectal Liver Metastases. *Clinical Cancer Research* **2019**, 25,  
33 5843–5851. doi:10.1158/1078-0432.ccr-19-0863.
- 34 37. Matano, M.; Date, S.; Shimokawa, M.; Takano, A.; Fujii, M.; Ohta, Y.; Watanabe, T.; Kanai, T.; Sato, T.  
35 Modeling colorectal cancer using CRISPR-Cas9-mediated engineering of human intestinal organoids.  
36 *Nature Medicine* **2015**, 21, 256–262. doi:10.1038/nm.3802.
- 37 38. Xie, M.; Qin, H.; Luo, Q.; Huang, Q.; He, X.; Yang, Z.; Lan, P.; Lian, L. MicroRNA-30a regulates cell  
38 proliferation and tumor growth of colorectal cancer by targeting CD73. *BMC Cancer* **2017**, 17, 305.  
39 doi:10.1186/s12885-017-3291-8.
- 30 39. Baraniskin, A.; Birkenkamp-Demtroder, K.; Maghnouj, A.; Zöllner, H.; Munding, J.; Klein-Scory, S.;  
31 Reinacher-Schick, A.; Schwarte-Waldhoff, I.; Schmiegel, W.; Hahn, S.A. MiR-30a-5p suppresses tumor

32 growth in colon carcinoma by targeting DTL. *Carcinogenesis* **2012**, 33, 732–739.

33 doi:10.1093/carcin/bgs020.

34 40. Liang, Z.; Li, X.; Liu, S.; Li, C.; Wang, X.; Xing, J. MiR-141–3p inhibits cell proliferation, migration and  
35 invasion by targeting TRAF5 in colorectal cancer. *Biochemical and Biophysical Research Communications*

36 **2019**, 514, 699–705. doi:10.1016/j.bbrc.2019.05.002.

37 41. Long, Z.H.; Bai, Z.G.; Song, J.N.; Zheng, Z.; Li, J.; Zhang, J.; Cai, J.; Yao, H.W.; Wang, J.; Yang, Y.C.; et  
38 al. miR-141 Inhibits Proliferation and Migration of Colorectal Cancer SW480 Cells. *Anticancer Research*

39 **2017**, 37, 4345–4352. doi:10.21873/anticancer.11828.

40 42. Li, Y.; Lauriola, M.; Kim, D.; Francesconi, M.; D’Uva, G.; Shibata, D.; Malafa, M.P.; Yeatman, T.J.;

41 Coppola, D.; Solmi, R.; et al. Adenomatous polyposis coli (APC) regulates miR17-92 cluster through -

42 catenin pathway in colorectal cancer. *Oncogene* **2016**, 35, 4558 – 4568. doi:10.1038/onc.2015.522.

43 43. Guo, X.; Zhu, Y.; Hong, X.; Zhang, M.; Qiu, X.; Wang, Z.; Qi, Z.; Hong, X. miR-181d and c-myc-mediated

44 inhibition of CRY2 and FBXL3 reprograms metabolism in colorectal cancer. *Cell death & disease* **2016**, 8,

45 e2958. doi:10.1038/cddis.2017.300.

46 44. Yamazaki, N.; Koga, Y.; Taniguchi, H.; Kojima, M.; Kanemitsu, Y.; Saito, N.; Matsumura, Y. High

47 expression of miR-181c as a predictive marker of recurrence in stage II colorectal cancer. *Oncotarget* **2016**,

48 8, 6970–6983. doi:10.18632/oncotarget.14344.

49 45. Pan, S.; Deng, Y.; Fu, J.; Zhang, Y.; Zhang, Z.; Qin, X. N6-methyladenosine upregulates miR-181d-5p in

50 exosomes derived from cancer-associated fibroblasts to inhibit 5-FU sensitivity by targeting NCALD in

51 colorectal cancer. *International Journal of Oncology* **2022**, 60, 14. doi:10.3892/ijo.2022.5304.

52 46. Dinh, T.A.; Jewell, M.L.; Kanke, M.; Francisco, A.; Sritharan, R.; Turnham, R.E.; Lee, S.; Kastenhuber,

53 E.R.; Wauthier, E.; Guy, C.D.; et al. MicroRNA-375 Suppresses the Growth and Invasion of Fibrolamellar

54 Carcinoma. *Cellular and molecular gastroenterology and hepatology* **2019**, 7, 803 – 817.

55 doi:10.1016/j.jcmgh.2019.01.008.

- 16 47. Kang, W.; Huang, T.; Zhou, Y.; Zhang, J.; Lung, R.W.M.; Tong, J.H.M.; Chan, A.W.H.; Zhang, B.; Wong,  
17 C.C.; Wu, F.; et al. miR-375 is involved in Hippo pathway by targeting YAP1/TEAD4-CTGF axis in gastric  
18 carcinogenesis. *Cell Death & Disease* **2018**, 9, 92. doi:10.1038/s41419-017-0134-0.
- 19 48. Alam, K.J.; Mo, J.S.; Han, S.H.; Park, W.C.; Kim, H.S.; Yun, K.J.; Chae, S.C. MicroRNA 375 regulates  
20 proliferation and migration of colon cancer cells by suppressing the CTGF-EGFR signaling pathway.  
21 *International Journal of Cancer* **2017**, 141, 1614 – 1629. doi:10.1002/ijc.30861.
- 22 49. Yun, S.M.; Kim, S.H.; Kim, E.H. The Molecular Mechanism of Transforming Growth Factor- Signaling for  
23 Intestinal Fibrosis: A Mini-Review. *Frontiers in pharmacology* **2019**, 10, 162.  
24 doi:10.3389/fphar.2019.00162.
- 25 50. Love, M.I.; Huber, W.; Anders, S. Moderated estimation of fold change and dispersion for RNA-seq data  
26 with DESeq2. *Genome biology* **2014**, 15, 550. doi:10.1186/s13059-014-0550-8.
- 27 51. Baran-Gale, J.; Fannin, E.E.; Kurtz, C.L.; Sethupathy, P. Beta cell 5'-shifted isomiRs are candidate  
28 regulatory hubs in type 2 diabetes. *PLOS ONE* **2013**, 8, e73240. doi:10.1371/journal.pone.0073240.
- 29 52. Chen, E.Y.; Tan, C.M.; Kou, Y.; Duan, Q.; Wang, Z.; Meirelles, G.V.; Clark, N.R.; Ma'ayan, A. Enrichr:  
30 interactive and collaborative HTML5 gene list enrichment analysis tool. *BMC Bioinformatics* **2013**, 14,  
31 128–128. doi:10.1186/1471-2105-14-128.
- 32 53. Kuleshov, M.V.; Jones, M.R.; Rouillard, A.D.; Fernandez, N.F.; Duan, Q.; Wang, Z.; Koplev, S.; Jenkins,  
33 S.L.; Jagodnik, K.M.; Lachmann, A.; et al. Enrichr: a comprehensive gene set enrichment analysis web  
34 server 2016 update. *Nucleic Acids Research* **2016**, 44, W90–W97. doi:10.1093/nar/gkw377.
- 35 54. Xie, Z.; Bailey, A.; Kuleshov, M.V.; Clarke, D.J.B.; Evangelista, J.E.; Jenkins, S.L.; Lachmann, A.;  
36 Wojciechowicz, M.L.; Kropiwnicki, E.; Jagodnik, K.M.; et al. Gene Set Knowledge Discovery with  
37 Enrichr. *Current Protocols* **2021**, 1, e90. doi:10.1002/cpz1.90.
- 38 55. Sarma, S.N.; Kim, Y.J.; Song, M.; Ryu, J.C. Induction of apoptosis in human leukemia cells through the  
39 production of reactive oxygen species and activation of HMOX1 and Noxa by benzene, toluene, and o-  
40 xylene. *Toxicology* **2011**, 280, 109–117. doi:10.1016/j.tox.2010.11.017.

- 41 56. Kwon, M.Y.; Park, E.; Lee, S.J.; Chung, S.W. Heme oxygenase-1 accelerates erastin-induced ferroptotic  
42 cell death. *Oncotarget* **2015**, *6*, 24393 – 24403. doi:10.18632/oncotarget.5162.
- 43 57. Zhang, L.; Jia, G.; Shi, B.; Ge, G.; Duan, H.; Yang, Y. PRSS8 is Downregulated and Suppresses Tumour  
44 Growth and Metastases in Hepatocellular Carcinoma. *Cellular Physiology and Biochemistry* **2016**, *40*, 757–  
45 769. doi:10.1159/000453136.
- 46 58. Wu, L.; Gong, Y.; Yan, T.; Zhang, H. LINP1 promotes the progression of cervical cancer by scaffolding  
47 EZH2, LSD1, and DNMT1 to inhibit the expression of KLF2 and PRSS8. *Biochemistry and Cell Biology*  
48 **2020**, *98*, 591–599. doi:10.1139/bcb-2019-0446.
- 49 59. Yang, Y.z.; Zhao, X.j.; Xu, H.j.; Wang, S.c.; Pan, Y.; Wang, S.j.; Xu, Q.; Jiao, R.q.; Gu, H.m.; Kong, L.d.  
50 Magnesium isoglycyrrhizinate ameliorates high fructose-induced liver fibrosis in rat by increasing miR-375-  
51 3p to suppress JAK2/STAT3 pathway and TGF-1/Smad signaling. *Acta Pharmacologica Sinica* **2019**, *40*,  
52 879–894. doi:10.1038/s41401-018-0194-4.
- 53 60. Zhang, X.; Chen, Q.; Song, H.; Jiang, W.; Xie, S.; Huang, J.; Kang, G. MicroRNA-375 prevents TGF--  
54 dependent transdifferentiation of lung fibroblasts via the MAP2K6/P38 pathway. *Molecular Medicine*  
55 *Reports* **2020**, *22*, 1803–1810. doi:10.3892/mmr.2020.11261.
- 56 61. Wei, R.; Yang, Q.; Han, B.; Li, Y.; Yao, K.; Yang, X.; Chen, Z.; Yang, S.; Zhou, J.; Li, M.; et al.  
57 microRNA-375 inhibits colorectal cancer cells proliferation by downregulating JAK2/STAT3 and  
58 MAP3K8/ERK signaling pathways. *Oncotarget* **2017**, *8*, 16633–16641. doi:10.18632/oncotarget.15114.
- 59 62. He, X.X.; Chang, Y.; Meng, F.Y.; Wang, M.Y.; Xie, Q.H.; Tang, F.; Li, P.Y.; Song, Y.H.; Lin, J.S.  
60 MicroRNA-375 targets AEG-1 in hepatocellular carcinoma and suppresses liver cancer cell growth in vitro  
61 and in vivo. *Oncogene* **2012**, *31*, 3357 – 3369. doi:10.1038/onc.2011.500.
- 62 63. Peck, B.C.E.; Mah, A.T.; Pitman, W.A.; Ding, S.; Lund, P.K.; Sethupathy, P. Functional Transcriptomics in  
63 Diverse Intestinal Epithelial Cell Types Reveals Robust MicroRNA Sensitivity in Intestinal Stem Cells to  
64 Microbial Status. *Journal of Biological Chemistry* **2017**, *292*, 2586 – 2600. doi:10.1074/jbc.m116.770099.



- 55 64. Gao, Z.; Zhou, L.; Hua, S.; Wu, H.; Luo, L.; Li, L.; Wang, S.; Liu, Y.; Zhou, Z.; Chen, X. miR-24-3p  
56 promotes colon cancer progression by targeting ING1. *Signal transduction and targeted therapy* **2020**, *5*,  
57 171 – 3. doi:10.1038/s41392-020-0206-y.
- 58 65. Zhang, H.W.; Shi, Y.; Liu, J.B.; Wang, H.M.; Wang, P.Y.; Wu, Z.J.; Li, L.; Gu, L.P.; Cao, P.S.; Wang, G.R.;  
59 et al. Cancer-associated fibroblast-derived exosomal microRNA-24-3p enhances colon cancer cell resistance  
60 to MTX by down-regulating CDX2/HEPH axis. *Journal of cellular and molecular medicine* **2021**.  
61 doi:10.1111/jcmm.15765.
- 62 66. Gao, Y.; Liu, Y.; Du, L.; Li, J.; Qu, A.; Zhang, X.; Wang, L.; Wang, C. Down-regulation of miR-24-3p in  
63 colorectal cancer is associated with malignant behavior. *Medical oncology (Northwood, London, England)*  
64 **2015-01**, *32*, 362 – 8. doi:10.1007/s12032-014-0362-4.
- 65 67. Zhang, Q.; Li, W.; Liu, G.; Tang, W. MicroRNA-24 regulates the growth and chemosensitivity of the  
66 human colorectal cancer cells by targeting RNA-binding protein DND1. *Journal of B.U.ON. : official*  
67 *journal of the Balkan Union of Oncology* **2019-07**, *24*, 1476 – 1481.
- 68 68. Chhabra, R.; Dubey, R.; Saini, N. Cooperative and individualistic functions of the microRNAs in the miR-  
69 23a27a24-2 cluster and its implication in human diseases. *Molecular Cancer* **2010**, *9*, 232–232.  
70 doi:10.1186/1476-4598-9-232.
- 71 69. ZHU, X.F.; LI, W.; MA, J.Y.; SHAO, N.; ZHANG, Y.J.; LIU, R.M.; WU, W.B.; LIN, Y.; WANG, S.M.  
72 Knockdown of heme oxygenase-1 promotes apoptosis and autophagy and enhances the cytotoxicity of  
73 doxorubicin in breast cancer cells. *Oncology Letters* **2015**, *10*, 2974–2980. doi:10.3892/ol.2015.3735.
- 74 70. Petrache, I.; Otterbein, L.E.; Alam, J.; Wiegand, G.W.; Choi, A.M.K. Heme oxygenase-1 inhibits TNF--  
75 induced apoptosis in cultured fibroblasts. *American Journal of Physiology-Lung Cellular and Molecular*  
76 *Physiology* **2000**, *278*, L312–L319. doi:10.1152/ajplung.2000.278.2.L312.
- 77 71. Becker, J.C.; Fukui, H.; Imai, Y.; Sekikawa, A.; Kimura, T.; Yamagishi, H.; Yoshitake, N.; Pohle, T.;  
78 Domschke, W.; Fujimori, T. Colonic expression of heme oxygenase-1 is associated with a better long-term

39 survival in patients with colorectal cancer. *Scandinavian Journal of Gastroenterology* **2009**, 42, 852–858.

40 doi:10.1080/00365520701192383.

41 72. Ishikawa, T.; Yoshida, N.; Higashihara, H.; Inoue, M.; Uchiyama, K.; Takagi, T.; Handa, O.; Kokura, S.;

42 Naito, Y.; Okanou, T.; et al. Different effects of constitutive nitric oxide synthase and heme oxygenase on

43 pulmonary or liver metastasis of colon cancer in mice. *Clinical & Experimental Metastasis* **2003**, 20, 445–

44 450. doi:10.1023/a:1025448403124.

45 73. Hofmans, S.; Berghe, T.V.; Devisscher, L.; Hassannia, B.; Lyssens, S.; Joossens, J.; Veken, P.V.D.;

46 Vandenaabeele, P.; Augustyns, K. Novel Ferroptosis Inhibitors with Improved Potency and ADME

47 Properties. *Journal of Medicinal Chemistry* **2016**, 59, 2041–2053. doi:10.1021/acs.jmedchem.5b01641.

48 74. Guo, J.; Xu, B.; Han, Q.; Zhou, H.; Xia, Y.; Gong, C.; Dai, X.; Li, Z.; Wu, G. Ferroptosis: A Novel Anti-

49 tumor Action for Cisplatin. *Cancer research and treatment : official journal of Korean Cancer Association*

50 **2018-04**, 50, 445 – 460. doi:10.4143/crt.2016.572.

51 75. Jackson, E.L.; Willis, N.; Mercer, K.; Bronson, R.T.; Crowley, D.; Montoya, R.; Jacks, T.; Tuveson, D.A.

52 Analysis of lung tumor initiation and progression using conditional expression of oncogenic K-ras. *Genes &*

53 *Development* **2001**, 15, 3243–3248. doi:10.1101/gad.943001.

54 76. Grimson, A.; Farh, K.K.H.; Johnston, W.K.; Garrett-Engle, P.; Lim, L.P.; Bartel, D.P. MicroRNA

55 Targeting Specificity in Mammals: Determinants beyond Seed Pairing. *Molecular Cell* **2007**, 27, 91–105.

56 doi:10.1016/j.molcel.2007.06.017.

57 77. Hung, Y.H.; Huang, S.; Dame, M.K.; Yu, Q.; Yu, Q.C.; Zeng, Y.A.; Camp, J.G.; Spence, J.R.; Sethupathy,

58 P. Chromatin regulatory dynamics of early human small intestinal development using a directed

59 differentiation model. *Nucleic Acids Research* **2021**, 49, gkaa1204–. doi:10.1093/nar/gkaa1204.

60  
61 **Author Contributions.**

12 J.W.V, C.G.D, and P.S designed the research. L.K completed miR-24 inhibitor optimization and cellTiter-  
13 glo/cell count analyses in HCT116 following miR-24 inhibition. T.H, S.A.M, and L.E.D generated and/or  
14 expanded genetically modified mouse enteroid models. M.T.S cultured WT mouse enteroids for miR-24  
15 inhibitor and Tgf- $\beta$  experiments. M.K downloaded and generated plot of miR-24 expression across TCGA  
16 tumor types. J.W.V completed remaining wet lab experiments and computational analyses. J.W.V, C.G.D, and  
17 P.S wrote the paper. All authors reviewed and approved the paper.

18  
19 **Competing interests.**

20 The authors declare that they have no competing interests.

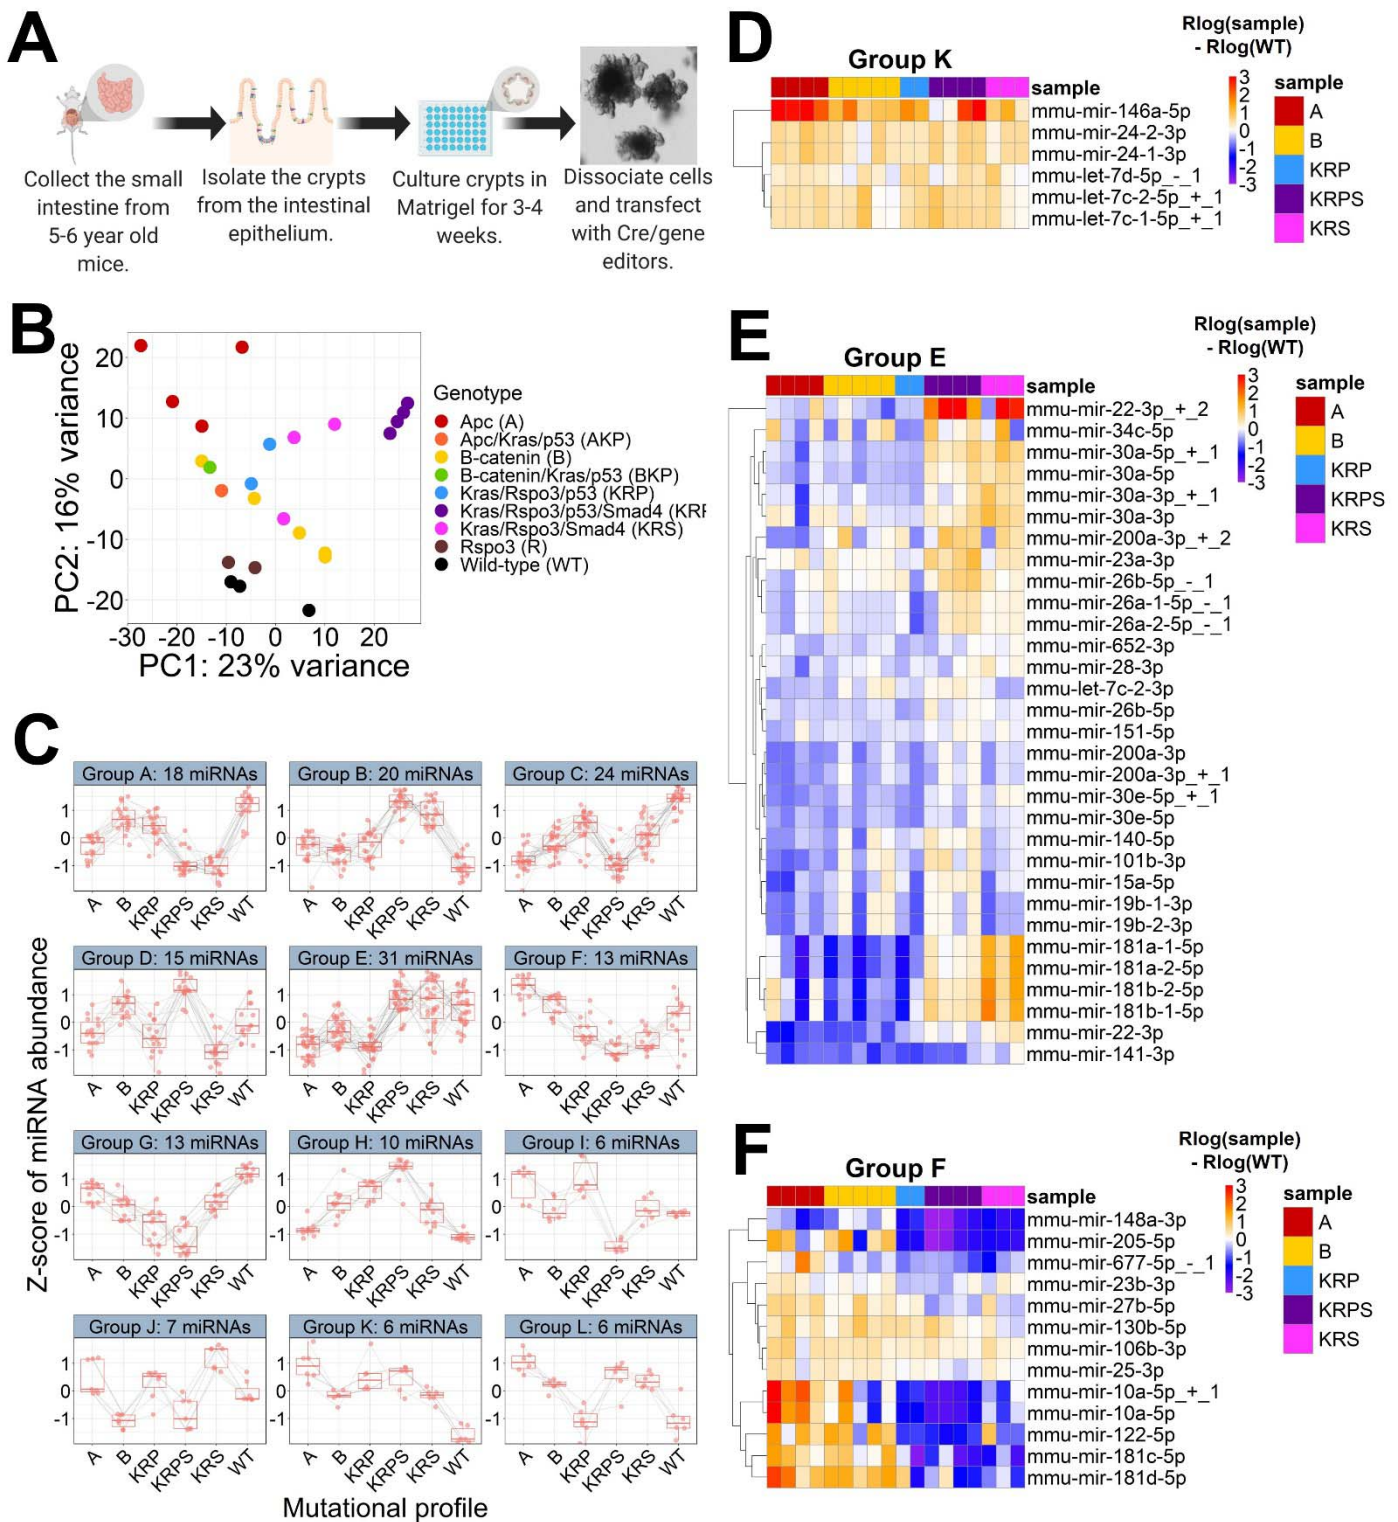

1  
2 **Figure 1: Genetically modified enteroids exhibit mutation-specific variation in miRNA expression.** (A)  
3 Diagram illustrating how enteroid models were generated (Created with BioRender.com). (B) Principal  
4 component analysis (PCA) plot generated using miRNA expression profiles from *Apc* (A; n=4), *Apc/Kras/p53*  
5 (AKP; n=1), *Ctnnb1* (B; n=5), *Ctnnb1/Kras/p53* (BKP; n=1), *Kras/Rspo3/p53* (KRP; n=2),  
6 *Kras/Rspo3/p53/Smad4* (KRPS; n=4), *Kras/Rspo3/Smad4* (KRS; n=3), *Rspo3* (R; n=2) mutant enteroids, and

7 wild-type (WT; n=3) controls. **(C)** Z-score of miRNA abundance for the 12 modules of miRNA expression,  
8 each with greater than 5 miRNAs in the module, as defined by DEGReport. Only miRNAs with baseMean >  
9 500 and p-adj < 0.05 following DESeq2 likelihood ratio test (LRT) were included in the analysis. **(D-F)**  
10 Heatmaps show the magnitude of change in miRNA expression relative to WT by subtracting rlog normalized  
11 miRNA expression for each enteroid sample by the rlog average WT expression. Heatmaps shown are for  
12 Group K, Group E and Group F as defined by DEGReport. Color intensity shows the difference between rlog  
13 normalized miRNA expression and average WT. Color scale minimum saturates at -3 and maximum saturates at  
14 3.

15

16

17

18

19

20

21

22

23

24

25

26

27

28

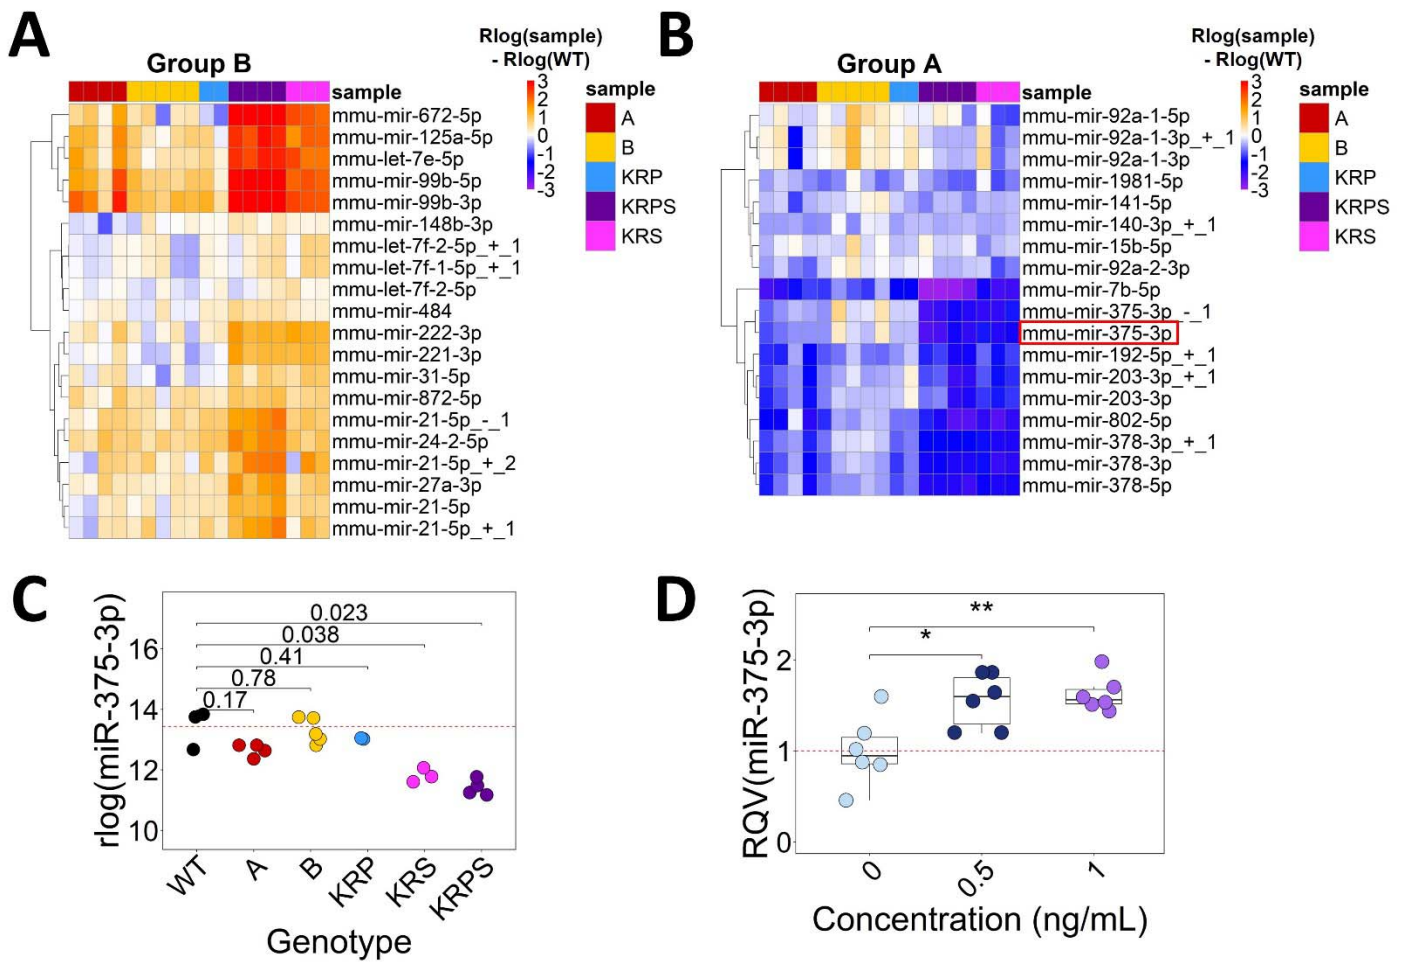

**Figure 2: Smad4 signaling is a major driver of miR-375-3p expression in mouse enteroids. (A, B)**

Heatmaps show the magnitude of change in miRNA expression relative to WT by subtracting rlog normalized miRNA expression for each enteroid sample by the rlog average WT expression. Heatmaps shown are for Group B and Group A as defined by DEGRReport. Color intensity shows rlog normalized miRNA expression in each genetically modified enteroid sample subtracted from average WT. Color scale minimum saturates at -3 and maximum saturates at 3. (C) Normalized miR-375-3p expression from small RNA-seq in each genotype. (D) MiR-375-3p expression from RT-qPCR following 0, 0.5, or 1 ng/mL treatment of mouse enteroids with recombinant human TGF-B1. Significance in (C) and (D) determined according to two-tailed Welch t-test.

\* $p < 0.05$ , \*\* $p < 0.01$ , \*\*\* $p < 0.001$ .

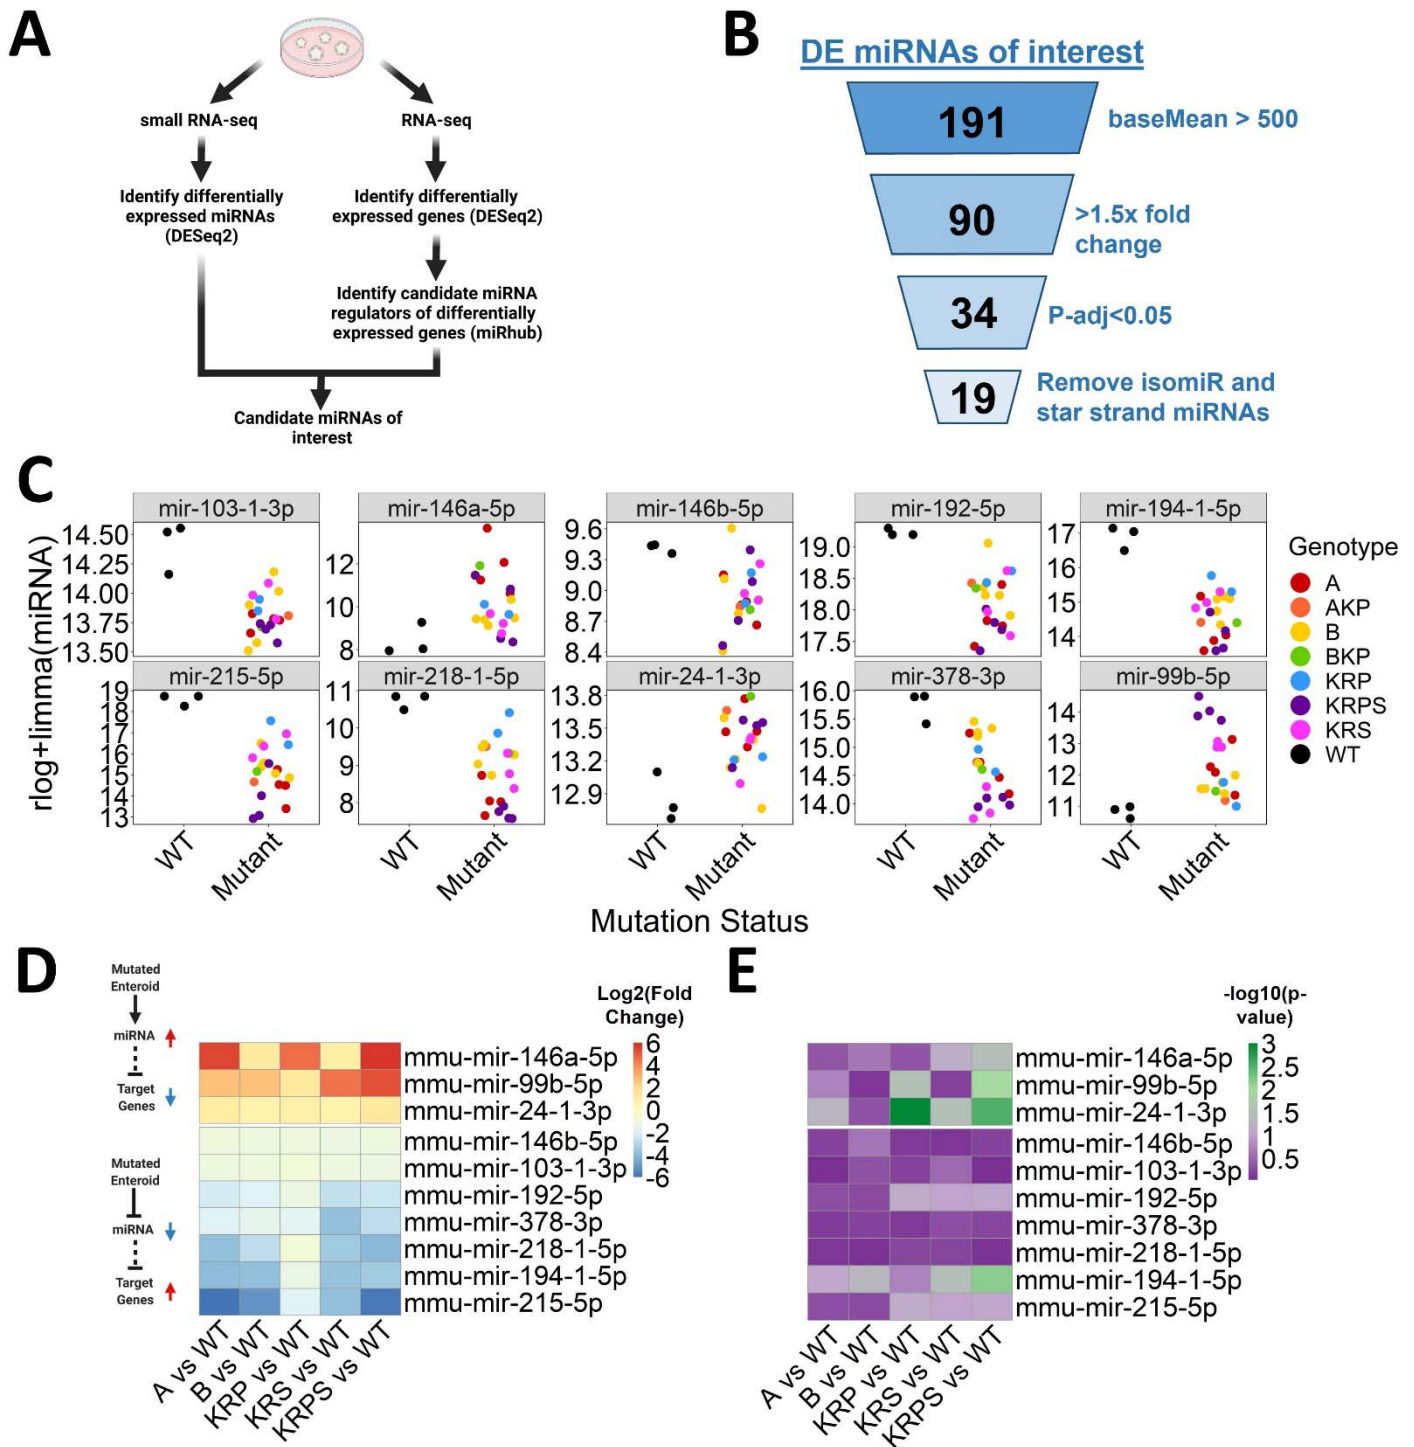

**Figure 3: Identification of differentially expressed miRNA regulators of gene expression across**

**genetically modified mouse enteroid models. (A)** Schematic of the strategy utilized to identify miRNAs

differentially expressed across a broad range of genotypes (Created with BioRender.com). **(B)** Results of the

strategy highlights 19 guide miRNAs that are significantly differentially expressed (DESeq2 p-adj < 0.05,

baseMean>500, >1.5x fold change) in mutant genotypes relative to WT. **(C)** As shown by the rlog normalized

11

12

13

14

15

16

47 counts, 10/19 miRNAs highlighted in **(B)** are differentially expressed in the same direction when comparing  
48 mutant genotypes (with  $n > 1$ ) to WT. In the case of miRNAs for which both paralogs were identified as  
49 differentially expressed, only one paralog is shown. **(D)** Heatmap showing  $\log_2$  fold change for miRNAs shown  
50 in **(C)**. Color intensity represents the  $\log_2$  fold change relative to WT. **(E)** Heatmap showing  $-\log_{10}(\text{p-value})$  of  
51 target site enrichment, calculated by miRhub (cons1) for each differentially expressed miRNA from **(D)**, in the  
52 list of genes that are differentially expressed (DESeq2  $p\text{-adj} < 0.05$ , baseMean  $> 500$ ,  $> 1.5x$  fold change) in the  
53 opposite direction of the miRNA.

54

55

56

57

58

59

50

51

52

53

54

55

56

57

58



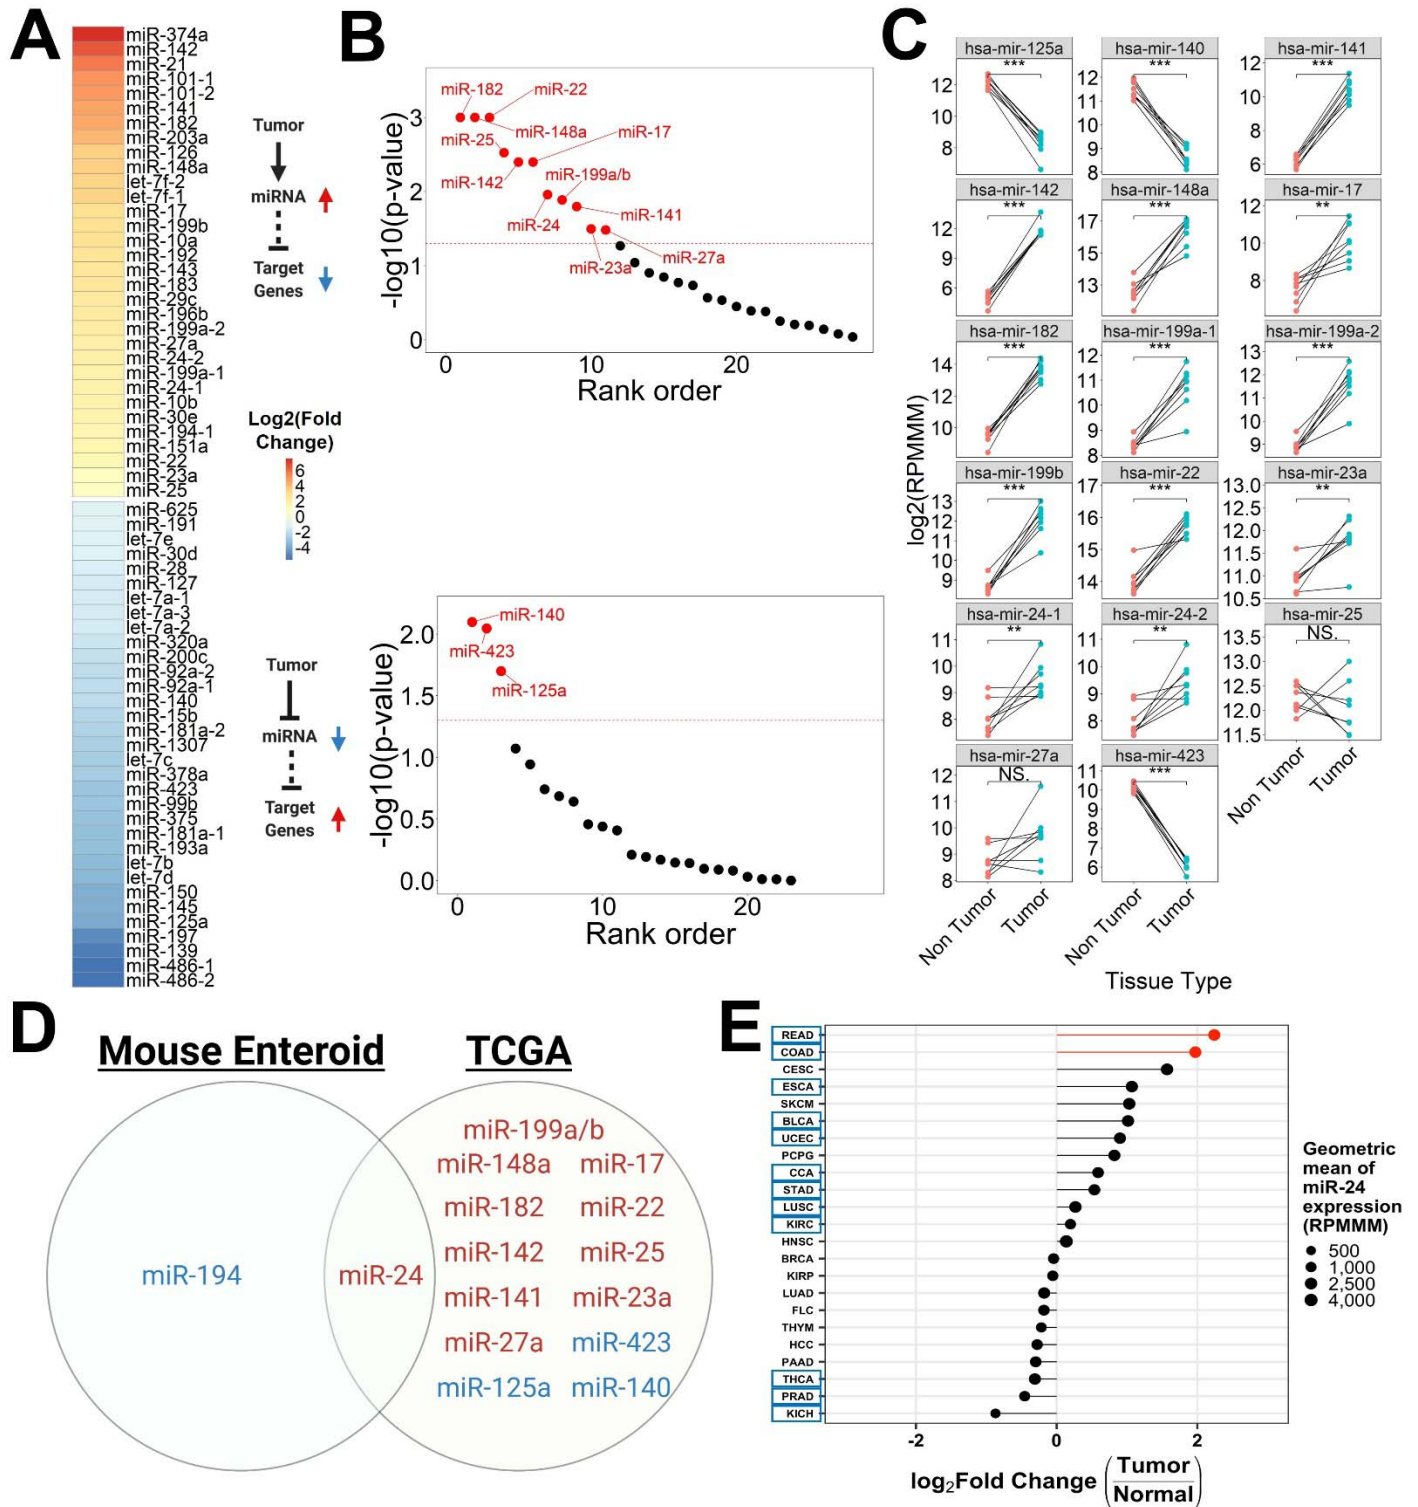

59

70 **Figure 4: miR-24-3p is a candidate regulator of gene expression in human CRC.** (A) Heatmap showing the  
 71 log<sub>2</sub> fold change for miRNAs differentially expressed (>1000 RPMMM in either condition, fold change >1.5x,  
 72 p-adj<0.05) between TCGA primary colon adenocarcinoma (n=371) and non-tumor tissue (n=8). Color  
 73 intensity represents the log<sub>2</sub> fold change. (B) Plot of the -log<sub>10</sub> (p-value) of target site enrichment, calculated

74 by miRhub (cons2) for each differentially expressed miRNA from **(A)**, using the list of genes that are  
75 differentially expressed (DESeq2 expression >1000 normalized counts in either condition, fold change >1.5x, p-  
76 adj<0.05) in the opposite direction of the miRNA. MiRNAs within the same family were grouped together  
77 under the same name. MiRNAs with target site enrichment p-value<0.05 shown in red. **(C)** Expression (log<sub>2</sub>  
78 RPMMM) of the 17 miRNAs from **(B)** in matched TCGA primary colon adenocarcinoma (n=8) and non-tumor  
79 (n=8) tissue (two-tailed Welch t-test). Lines connect tissue samples collected from the same patient. **(D)** Venn  
80 diagram for miRNAs of interest identified by the mouse enteroid and TCGA analyses (Created with  
81 BioRender.com). MiRNAs in red are upregulated. MiRNAs in blue are downregulated. Paralogs are listed as  
82 one miRNA. **(E)** Log<sub>2</sub> fold change of miR-24-3p expression (RPMMM) across TCGA tumor types (n=23).  
83 Colon (COAD) and rectal (READ) adenocarcinomas in red. Circle size represents the geometric mean  
84 (RPMMM) of miR-24-3p for each tumor type. Tumor types highlighted by blue boxes have Benjamini-  
85 Hochberg padj<0.05. \*p<0.05, \*\*p<0.01, \*\*\*p<0.001.

36

37

38

39

30

31

32

33

34

35

36

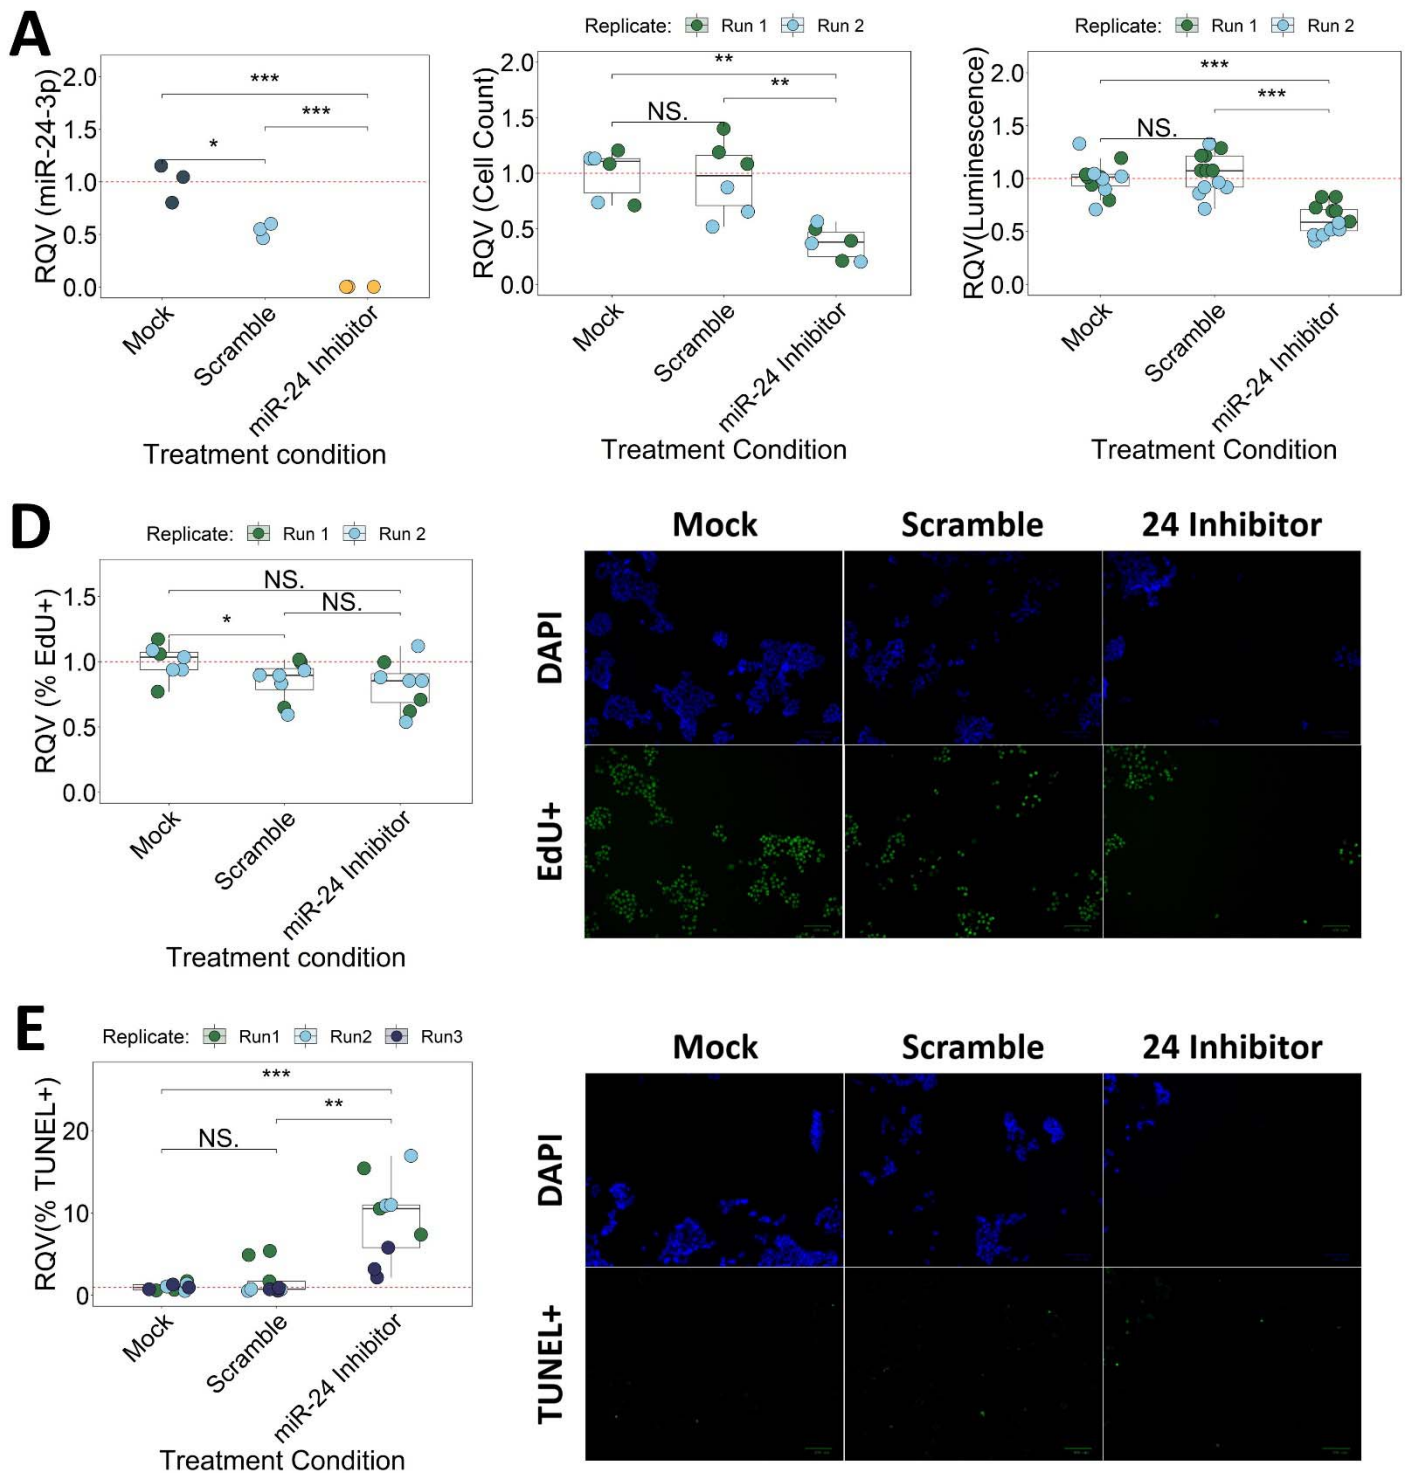

37  
38 **Figure 5: Inhibition of miR-24-3p increases apoptosis in HCT116 cells.** (A) MiR-24-3p expression from  
39 RT-qPCR following mock, 100 nM scramble, or 100 nM miR-24 inhibitor treatment of HCT116 cells.  
40 Significance determined by two-tailed Student's t-test. Cell count (B), CellTiter-glo (C), EdU incorporation  
41 (D), and TUNEL (E) assays following mock, 100 nM scramble, or 100 nM miR-24 inhibitor treatment in

HCT116 cells. Significance determined by two-sided Wilcoxon test. Results reported relative to average mock control. Color of data points represents experimental replicate. \* $p < 0.05$ , \*\* $p < 0.01$ , \*\*\* $p < 0.001$ .

04

05

06

07

08

09

10

11

12

13

14

15

16

17

18

19

20

21

22

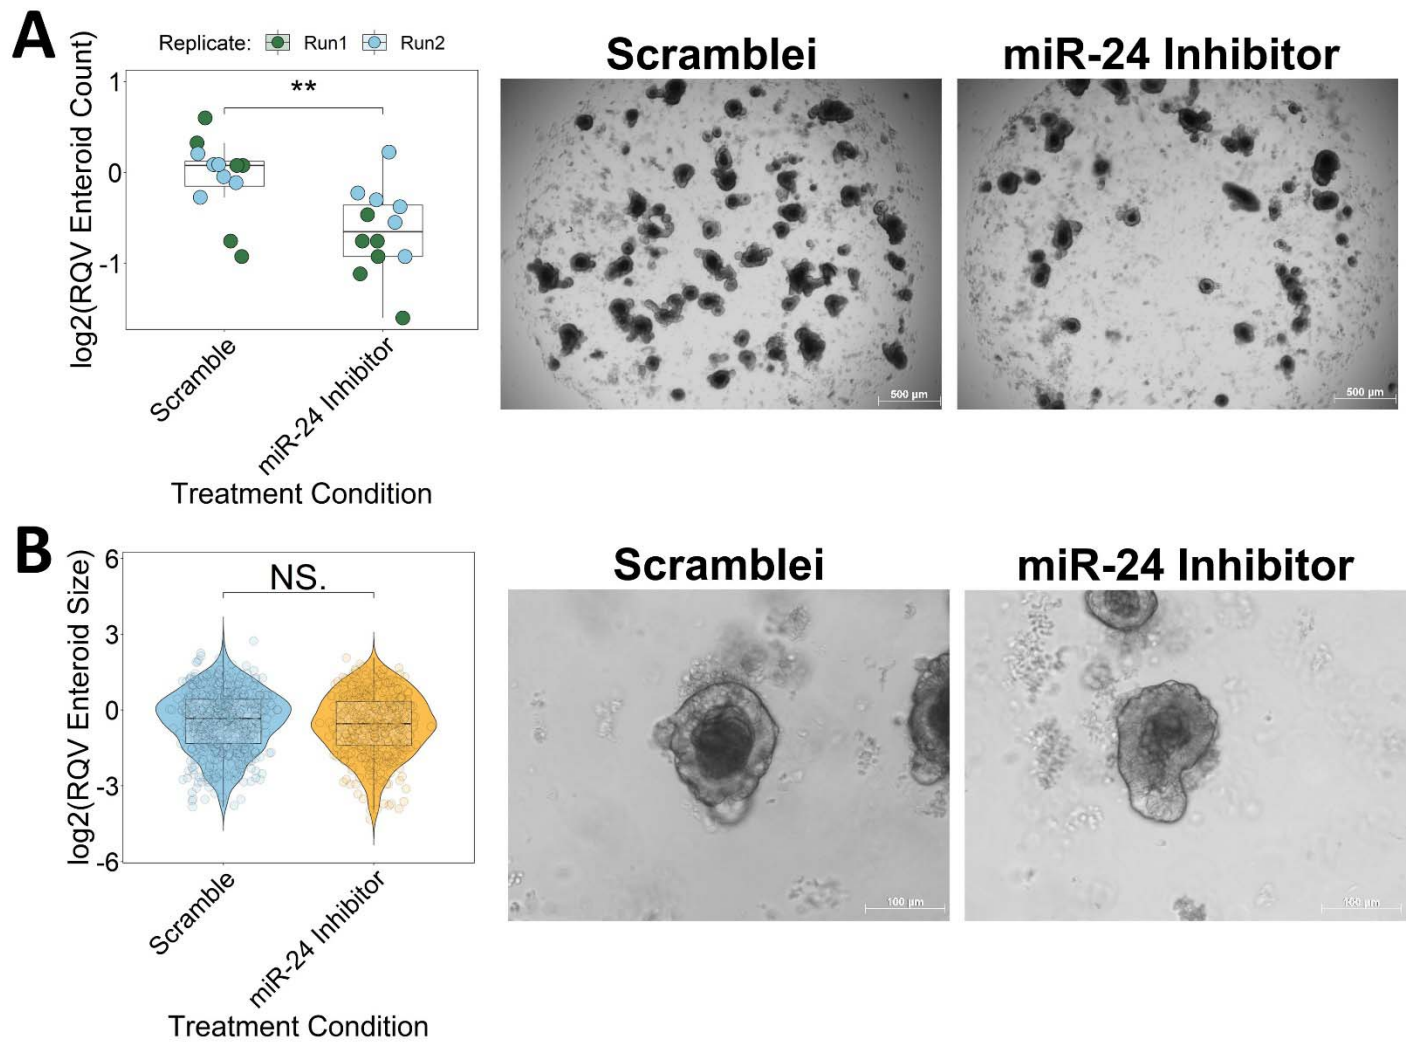

**Figure 6: miR-24-3p inhibition decreases mouse enteroid survival.** (A) Number of WT enteroids following scramble or miR-24 inhibitor treatment. Significance determined by two-tailed Welch t-test. Data reported relative to scramble average. Color of data points represents experimental replicate. (B) Violin plot of enteroid size across experimental replicates following scramble or miR-24 inhibitor treatment. Significance determined by two-tailed Welch t-test. Data reported relative to average scramble control. \* $p < 0.05$ , \*\* $p < 0.01$ , \*\*\* $p < 0.001$ .

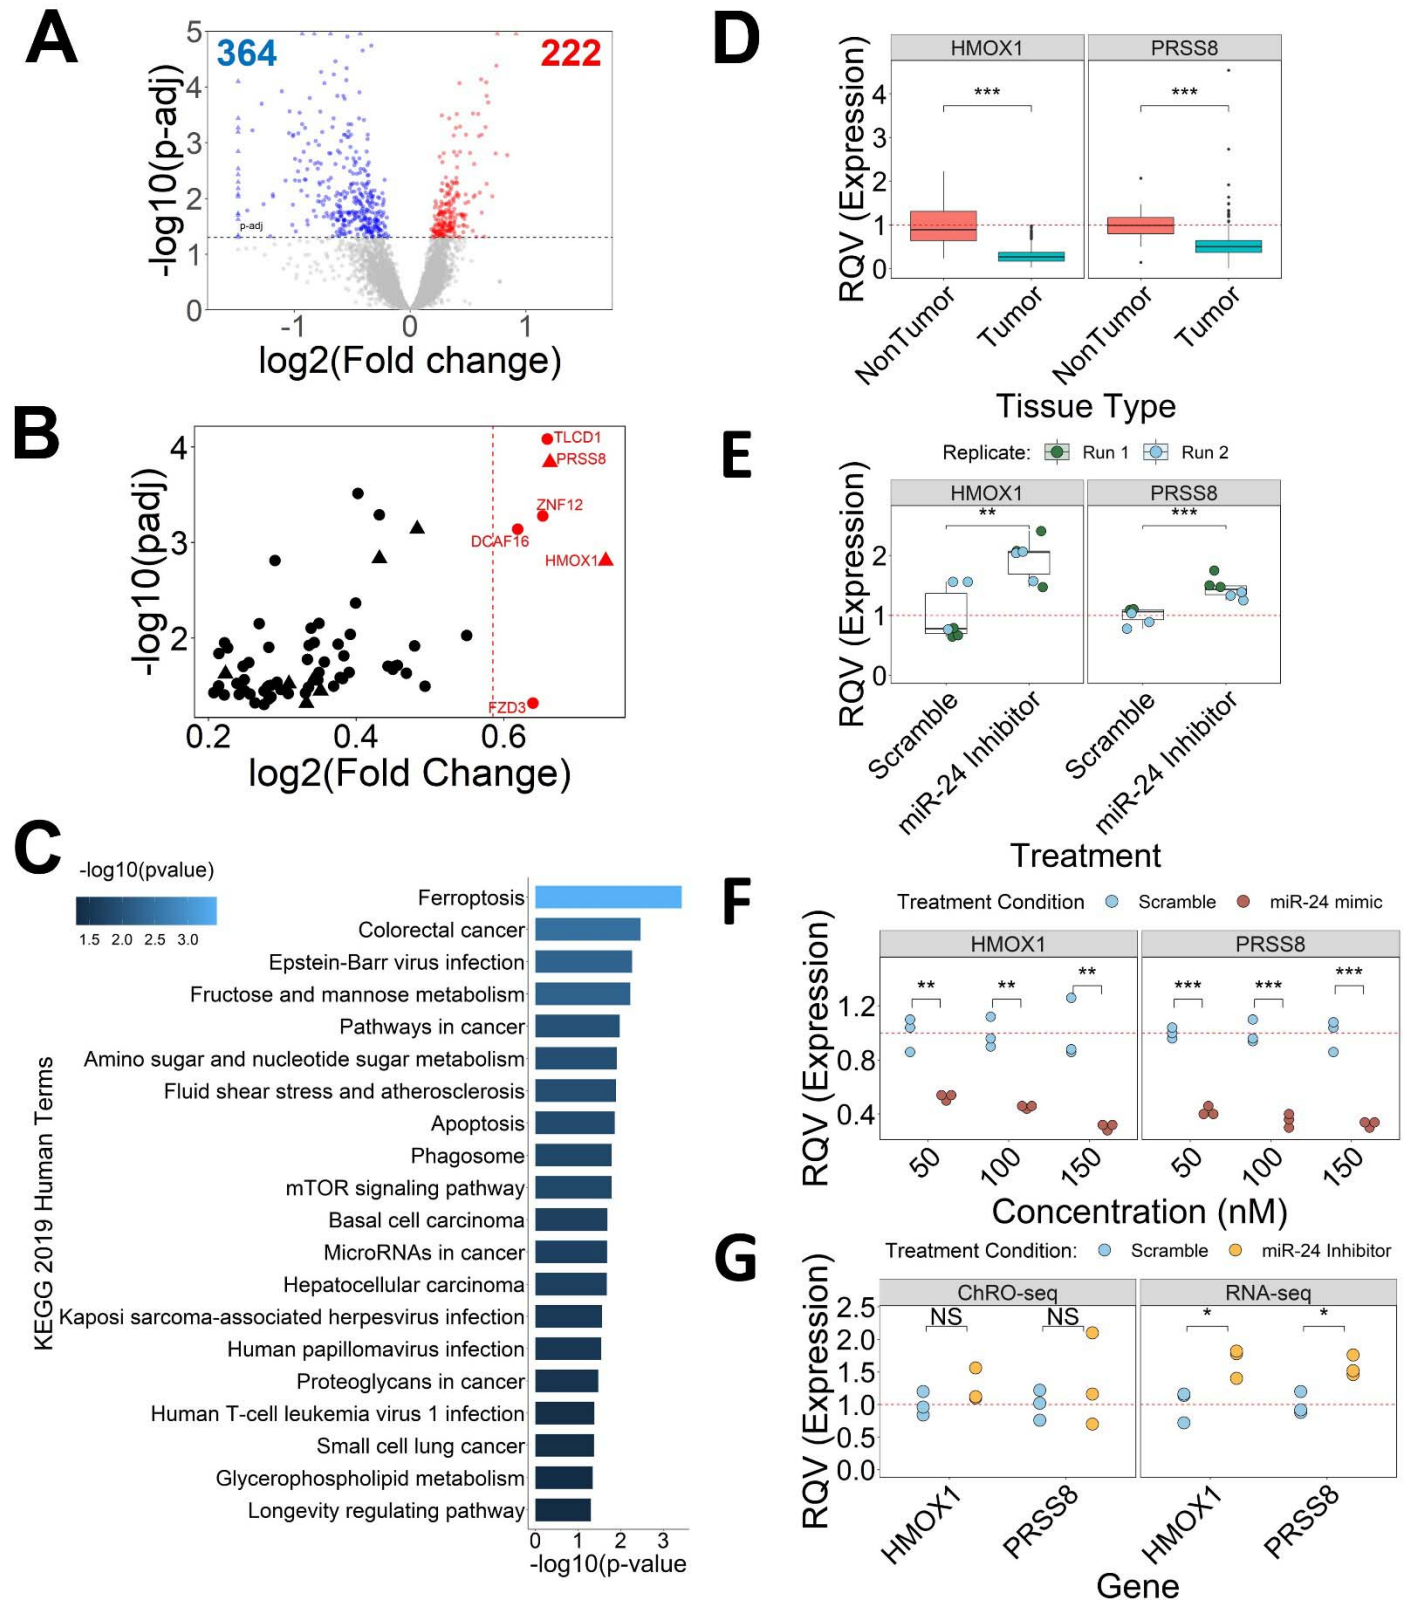

**Figure 7: *HMOX1* and *PRSS8* are post-transcriptionally regulated by miR-24-3p.** (A) Volcano plot showing differentially expressed genes in HCT116 treated with a 100 nM miR-24 inhibitor relative to scramble control. Genes filtered for expression >500 normalized counts in either condition. Horizontal dashed line

33

34

35

36

37 represents p-adj cutoff of 0.05 (DESeq2). **(B)** Scatterplot of predicted miR-24-3p target genes that are  
38 upregulated (DESeq2 p-adj<0.05, >500 normalized counts in either condition) following miR-24-3p inhibition  
39 (n=70). Vertical red line represents 1.5x fold change. Genes in red exhibit >1.5x fold change (n=6). Genes also  
40 significantly downregulated in TCGA tumor tissue compared to non-tumor are represented by triangles.  
41 Remaining genes represented by circles. **(C)** KEGG pathway enrichment analysis of 70 genes in **(B)**. Pathways  
42 with p-value <0.05 represented in figure. Color represents the -log<sub>10</sub> p-value. **(D)** Normalized expression from  
43 small RNA-seq of *HMOX1* and *PRSS8* in TCGA colon tumor relative to non-tumor tissue. Significance  
44 determined by two-sided Wilcoxon test. **(E)** RT-qPCR for *HMOX1* and *PRSS8* following 100 nM miR-24  
45 inhibitor or scramble treatment in HCT116 cells. Significance determined by two-tailed Welch t-test. Color of  
46 data points represents experimental replicate. **(F)** RT-qPCR for *HMOX1* and *PRSS8* following HCT116  
47 treatment with 50, 100 or 150 nM miR-24 mimic or scramble. Significance determined by two-tailed Student's  
48 t-test. A non-parametric test was applied (two-sided Wilcoxon test), but significance couldn't be achieved due to  
49 low sample size. **(G)** DESeq2 normalized RNA-seq and ChRO-seq counts for *HMOX1* and *PRSS8* expression  
50 following HCT116 treatment with scramble or miR-24 inhibitor. Significance determined by two-tailed Welch  
51 t-test. \*p<0.05, \*\*p<0.01, \*\*\*p<0.001.
